# Supplementary material
Source: MDPI journal article supplement (https://www.mdpi.com/1099-4300/16/5/2713)
Supplement: s1 [file s1]

GAMS 24.1.3  r41464 Released Jul 26, 2013 WIN-VS8 x86/MS Windows 02/27/14 17:19:33 Page 1
G e n e r a l   A l g e b r a i c   M o d e l i n g   S y s t e m
C o m p i l a t i o n


      Model CECS(Armington): constat elasticity of utility demand between locall
      y produced good and imported good).
      Recent developments in information-theoretic built upon Tsallis non-additi
      ve statistics are powerful enough to put
      established theory in question and suggest new applications.
      Constant elasticity of substitution class of aggregating nonlinear functio
      ns(CES) remains intractable while trying
      to analytically estimate its parameters. In empirical research, various no
      nlinear approximation technics like the
      Taylor algorithm are applied and completed by least square methods approac
      hes. As it can be shown(Bwanakare,2014), such numerical
      approaches are not conceptually fitted  to this type of (non) ergodic mode
      ls and estimated parameters should remain
      biaised and inefficient.  Through this program we propose a power law(PL)-
       driven estimation  approach, thus moving
      away from Gaussian ergodic hypothesis to more general Levy instable time (
      or space) processes characterized by tail
      queues,  long memory and complex correlation and by plausible convergence,
       in relative long range, to  attraction basin
      of central theorem limit. Presented estimation  procedure could be seen as
       generalization to non-ergodic systems of
      Gibbs-Kullback-Leibler works on information divergence and of Golan(et,al.
      ) on cross-entropy econometrics. Technically
      we minimize Tsallis non-extensive relative entropy criterion function unde
      r consistency  moment-contraints restrictions
      -incorporating the reparameterized CES function, and regular normality con
      ditions. As such, the approach then encompasses
      Bayesian information processing rule while remaining fundamentally based u
      pon thermodynamics second law.This code GAMS
      is in essence based upon the Sherman Robinson and Moataz El-Said  code pro
      posed for a social accounting balancing (dec.2000).

  20  *Setting variables and parameters of a CES model
  21  SET
  22      M index /1*5/
  23      J index /1*5/
  24      N index /1*5/
  25      t index/1*12/
  26      k index /lnVAt,lnKt,lnLt,co,ao,pu,du/
  27  *    Y(t,*) index /lnVAt/
  28     var(k) index/lnKt,lnLt,co/
  29     par(k) index /ao,pu,du/
  30  *,lnLt,ao,t,pu,du/
  31  *Alias(t,k);
  32  ;
  33
  34  *Attention:The next is the Armington model(LNVAT:MO;LNKt:domestic market p
      roduct demand; LNLT:import_M):
  35  table data(k,T)
  36            1                2                3                4
         5                6                7                8                9
                  10                11             12
  37  LNVAT     8.6907429        9.0260109        9.2124336        9.324997
         9.4419172        9.6890636        9.8765029        10.210702        10.
      5497776     10.6213706        10.162134      10.3587449
  38  LNKt      5.7193083        5.6933583        5.7511062        5.7922256
         5.8460456        5.8133424        5.7727866        5.7106479         5.
      795427       5.7965673         5.924294       5.6926819
  39  LNLT      2.938            3.272            3.361            3.414
         3.526            3.796            4.029            4.411             4.
      672          4.727             4.153          4.551
  40  CO        1                1                1                1
         1                1                1                1                 1
                   1                 1              1
  41  ;
  42
  43  *display data;
  44  parameter e1(t) error term for period one
  45  variable et(t) error term for period t
  46  variable ett(t) variance of error term in period t
  47  *variable lamda1 coefficient of first order autocorrelation
  48
  49  Positive variables
  50           A(M)  probabilities for posterior  alfa
  51           P(M)  probabilities for posterior p
  52           D(M)  probabilities for posterior d
  53           q    parameter tsallis
  54           H(t,M) all variables together
  55           W(t,j) error probabilities for posterior weights
  56                    ;
  57   parameter
  58           Beta(par)               estimates
  59           X(T,var)                explanatory variables
  60           Y(T,*)                  dependent variables
  61           epsilon                 positive small real
  62  *         sigma(k)               error on depedent var
  63           v(t,j)                  error support on Yt
  64           A0(M)                   a priori parameter A
  65           P0(M)                   a priori parameter P
  66           D0(M)                   a priori parameter D
  67           W0(t,j)                 a priori weight W
  68
  69  * defining parameter support areas.These are defined according to Golan A,
      D.Miller and G.Judge(1996)
  70           epsilon positive small real
  71           alfa /0.05/
  72            Z(M) parameter support /1 -5.0000
  73                                   2  -2.50
  74                                   3  -0.000000001
  75                                   4  2.50
  76                                   5  5.00/
  77           E(j) parameter support /1 -3.000
  78                                   2 -1.5
  79                                   3  0
  80                                   4  1.5
  81                                   5  3.00/
  82  * setting starting values for variables.
  83            epsilon /0.0010/;
  84             A.lo(M)=epsILON ;
  85  *          A.l(M)=0.0002;
  86            A.up(M)=1 ;
  87  *          P.lo(M)=epsilon;
  88            P.lo(M)=epsILON;
  89  *          P.l(M):=0.0002 ;
  90            D.lo(M)=epsILON  ;
  91  *          D.l(M)=0.0002;
  92            D.up(M)=1  ;
  93  *          H.lo(t,M)=epsilon ;
  94  *          H.l(t,M)=0.0002;
  95  *          H.up(t,M)=1 ;
  96  *The next starting values are close to outputs of nonlinear estimation:we
      maximize the odds of reaching global optimum. solution
  97            A0(M)=ABS(2.15/Z(M)) ;
  98  *          A0(M)=ABS(1.95/Z(M)) ;
  99  *          A.L(M)=ABS(2.0189/Z(M)) ;
 100            P0(M)=ABS(-0.53/Z(M));
 101  *          P0(M)=ABS(0.6/Z(M));
 102            D0(M)=ABS(0.48/Z(M))  ;
 103  *          A0(M)= .210;
 104  *          p0(M)= .220;
 105  *          d0(M)= .2150;
 106  DISPLAY A.L,P.L,D.L;
 107
 108            W.lo(t,j)=epSILON;
 109            W.up(t,j)=1;
 110            W0(t,j)=1/5;
 111  *          D.up(M)=1;
 112            q.l = 1.0250;
 113  *          q.up =9/3;
 114  *          q.lO = 1.63 ;
 115  *          q.lO=1.008;
 116           q.lO=1.00000331;
 117  *For understanding the source of starting values, see Golan A(et al.), 199
      6. We start with values
 118  * assumed to follow Gaussian law(thus, the three sigma rule). Note that th
      is is a hypothesis in Bayesian sens:the true distribution will take form
 119  *with new added information.
 120  parameter
 121             sigmaa(k) Yt standard error /LnVat 0.450000/;
 122
 123            v(t,"1")  =(-3.0*sigmaa("lnVAt")) ;
 124            v(t,"2")  =( -1.0*sigmaa("lnVAt"));
 125            v(t,"3") = ( 0*sigmaa("lnVAt"));
 126            v(t,"4") = (1.0*sigmaa("lnVAt"));
 127            v(t,"5") = ( 3.0*sigmaa("lnVAt")) ;
 128
 129            W.L(t,"1")=1/72 ;
 130            W.L(t,"2")=27/72 ;
 131            W.L(t,"3")=16/72 ;
 132            W.L(t,"4")=27/72 ;
 133            W.L(t,"5")=1/72;
 134
 135            A.L(M)=1/5 ;
 136
 137
 138            D.L(M)=1/5 ;
 139            P.L(M)=1/5 ;
 140
 141  Variable OBJ1 objective1
 142  Variable OBJ2 objective2
 143  Variable qTsal1 varA
 144  Variable qTsal2 varP
 145  Variable qTsal3 varD
 146  Variable qTsal4(t) varW  ;
 147  Variable OBJ objective ;
 148
 149  Y(t,"lnVAt") =(data("lnVAt",t));
 150  X(t,"lnKt") =(data("lnKt",t));
 151  X(t,"lnLt") =(data("lnLt",t));
 152  *X(t,"t") =data("t",t);
 153  X(t,"co") =(data("co",t));
 154  qTsal1.l=sum(m,A.l(m)**q.l);
 155  qTsal2.l=sum(m,P.l(m)**q.l);
 156  qTsal3.l=sum(m,D.l(m)**q.l);
 157  qTsal4.l(t)=sum(j,W.l(t,j)**q.l);
 158  display qTsal1.l,qTsal2.l,qTsal3.l,qTsal4.l;
 159  *,qTsal4.l;
 160
 161  Equations
 162           Entropy1  objective function Tsallis entropy parameter related pr
      obabilities
 163           Entropy2 objective function Tsallis entropy random error variable
 164           ADD1   parameter additivity constraints A
 165           ADD2    error additivity constraints P
 166           ADD3   parameter additivity constraints D
 167           ADD4(t)   parameter additivity constraints W
 168           ADD5     errors additivity to zero W
 169           ADD6      constraint of proportionality d
 170           ADD7      constraint of proportionality d
 171  *        ADD8     contraining rest to sum to zero
 172           ADD9    contraining of elasticity parameter
 173  *         ADD11(T) autocorelation
 174           CON(T)      consistency constraints
 175           conTsal1    Tsallis consistency A
 176           conTsal2    Tsallis consistency P
 177          conTsal3    Tsallis consistency D
 178           conTsal4(t) Tsallis consistency W  ;
 179  ENTROPY2..OBJ2   =E= (1-alfa)*[SUM((t,j),(w(t,j)**q)*(w(t,j)/w0(t,j))**(q-
      1)-1)]/(q-1);
 180  ENTROPY1..OBJ1 =E=ALFA*[[SUM(m,(A(m)**q)*(A(m)/A0(m))**(q-1)-1)]/(q-1)+[SU
      M(m,(P(m)**q)*(P(m)/P0(m))**(q-1)-1)]/(q-1)+[SUM(m,(D(m)**q)*(D(m)/D0(m))*
      *(q-1)-1)]/(q-1)];
 181
 182  *ENTROPY1..     OBJ2 =E= ALFA*[[SUM(m,(A(m)**q)*(A(m)/A0(m))**(q-1)-1)]/(q
      -1)+[SUM(m,(P(m)**q)*(P(m)/P0(m))**(q-1)-1)]/(q-1)+[SUM(m,(D(m)**q)*(D(m)/
      D0(m))**(q-1)-1)]/(q-1)]+ (1-alfa)*[SUM((t,j),(w(t,j)**q)*(w(t,j)/w0(t,j))
      **(q-1)-1)]/(q-1);
 183  *ENTROPY1..     OBJ2   =E= ALFA*(-SUM(m, [A(m)*LOG(A(m) + epsILON)- LOG(A0
      (m) + epsILON)])-SUM(m, [P(m)*LOG(P(m) + epsILON)- LOG(P0(m) + epsILON)])-
      SUM(m, [D(m)*LOG(D(m) + epsILON)- LOG(D0(m) + epsILON)]))-(1-ALFA)* SUM((t
      ,j),(w(t,j)*LOG(w(t,j) + epsILON)- LOG(w(t,j) + epsILON))) ;
 184  *+(1-alfa)*[SUM((t,j),((w(t,j)**q)*(w0(t,j)**(1-q)))-1)/(q-1)];
 185  *ENTROPY1..     OBJ2 =E=alfa*[[1/(1-q)*SUM[m,  A(m)*[(  A(m))**(q-1)-( A0(
      m))**(q-1)]]-SUM(M,  (A(M)- A0(M))*( A0(M))**(q-1))]+[1/(1-q)*SUM[m,  P(M)
      *[(  P(m))**(q-1)-( P0(m))**(q-1)]]-SUM(M,  (P(M)- P0(M))*( P0(M))**(q-1))
      ]+[SUM[M,  D(M)*[(  D(M))**(q-1)-( D0(M))**(q-1)]]-SUM(M,  (D(M)- D0(M))*(
       D0(M))**(q-1))]]+[(1-alfa)/(1-q)*SUM[(t,j),  W(t,j)*[( W(t,j))**(q-1)-( W
      0(t,j))**(q-1)]]-SUM((t,j),  (W(t,j)- W0(t,j))*( W0(t,j))**(q-1))];
 186  *ADD8..SUM(T,et(t))=E=0;
 187
 188  *ADD11(T)..lamda1*et(t-1)+sum(J,(W(T,j)**q)*V(t,j))=e=et(t);
 189
 190  *ADD9(t)..SUM(j,W(t,j)*v(t,j))=E=0;
 191  ADD6.. sum(M, ((d(M)))*Z(M))=l=1-epsilon ;
 192  ADD5.. sum(M, ((d(M)))*Z(M))=g=epsilon ;
 193  *ADD7.. sum(M, d(M)*Z(M)) =g=0;
 194  ADD7.. sum(M, ((p(M)))*Z(M)) =l=-1;
 195  *ADD7..sum(M, ((p(M)**q)/qTsal2)*Z(M))=l=-1;
 196  ADD9.. sum(t,sum[j,(W(t,j))*V(t,j)])=e=0;
 197  *ADD8..sum(M,(A(M)**q)*Z(M))=g=0;
 198  conTsal1.. qTsal1=e=sum(m,A(m)**q);
 199  conTsal2.. qTsal2=e=sum(m,P(m)**q);
 200  conTsal3.. qTsal3=e=sum(m,D(m)**q);
 201  conTsal4(t).. qTsal4(t)=e=sum(j,W(t,j)**q);
 202  ADD1..sum(m, A(m)) =E=1;
 203  ADD2..sum(m, P(m)) =E=1;
 204  ADD3..sum(m, D(m)) =E=1;
 205  ADD4(t)..sum(j,W(t,j))=E=1;
 206  *CON(T)..[sum(M, (A(M)**q)*Z(M)*X(t,"co"))]*[sum[m,(d(M)**q)*Z(M)]*X(t,"ln
      Lt")**(-sum[m,(P(M)**q)*Z(M)])+(1-sum[m,(d(M)**q)*Z(M)])*X(t,"lnKt")**(-su
      m[m,((P(M))**q)*Z(M)])]**[-1/(sum(m,(P(M)**q)*(Z(M))))]+sum[j,(W(t,j)**q)*
      V(t,j)]-(Y(T,"lnVAt"))=E=0;
 207  CON(T)..[sum(M, (A(M)**q)*Z(M)/qTsal1*X(t,"co"))]*[sum[m,(d(M)**q)*Z(M)/qT
      sal3]*X(t,"lnLt")**(-sum[m,(P(M)**q)*Z(M)/qTsal2])+(1-sum[m,(d(M)**q)*Z(M)
      /qTsal3])*X(t,"lnKt")**(-sum[m,((P(M))**q)*Z(M)/qTsal2])]**[-1/(sum(m,(P(M
      )**q)*(Z(M)/qTsal2)))]+sum[j,(W(t,j)**q)*V(t,j)/qTsal4(t)]-(Y(T,"lnVAt"))=
      E=0;
 208  *+sum[j,(W(t,j)**q)*V(t,j)*qtsal4(t)**(-1)]
 209  *CON(T)..[sum(M, (A(M))*Z(M)*X(t,"co"))]*[sum[m,(d(M))*Z(M)]*X(t,"lnLt")**
      (-sum[m,(P(M))*Z(M)])+(1-sum[m,(d(M))*Z(M)])*X(t,"lnKt")**(-sum[m,((P(M)))
      *Z(M)])]**[-1/(sum(m,(P(M))*(Z(M))))]+sum[j,(W(t,j)**q)*V(t,j)]-(Y(T,"lnVA
      t"))=E=0;
 210  Model CESFrance /ALL/;
 211  CESFrance.HOLDFIXED = 1 ;
 212  CESFrance.scaleopt=1 ;
 213  option reslim=100000;
 214  option DNLP = minos5;
 215  *option DNLP = conopt2;
 216  *option NLP = snopt;
 217  Solve CESFrance MINImising OBJ1 using DNLP;
 218  Solve CESFrance minimising OBJ2 using DNLP;
 219  OBJ2.L = ALFA*[[SUM(m,(A.L(m)**q.L)*(A.L(m)/A0(m))**(q.L-1)-1)]/(q.L-1)+[S
      UM(m,(P.L(m)**q.L)*(P.L(m)/P0(m))**(q.L-1)-1)]/(q.L-1)+[SUM(m,(D.L(m)**q.L
      )*(D.L(m)/D0(m))**(q.L-1)-1)]/(q.L-1)]+ (1-alfa)*[SUM((t,j),(w.L(t,j)**q.L
      )*(w.L(t,j)/w0(t,j))**(q.L-1)-1)]/(q.L-1);
 220  *SUM((t,m),W.l(t,m)*E(j))=0;
 221  *Solve CESFrance maximising OBJ2 using NLP;
 222  beta("ao") =(sum(M, (A.L(M))*Z(M))) ;
 223  beta("pu") = sum(M, (p.L(M))*Z(M)) ;
 224  beta("du") =  sum(M, (d.L(M))*Z(M)) ;
 225  DISPLAY q.l;
 226  *in sample teoretical yy
 227  parameter
 228  logLL(T) in sample pronostical Y
 229  AV_Y   average of Y
 230  ets(t) estimation of random term
 231  R_2  determination coefficient
 232  Etts  absolute value error total
 233  eTTT(t) total errors
 234  S(par) error on parameter
 235  etttt total errors;
 236  *S(par)=(1-sum(k,beta(par)**q.l))/[(q.l-1)]*(1-q.l)/3*(22**(1-q.l)-1);
 237  logLL(T) = (beta("ao")) *[beta("du")*((X(t,"lnLt")))**(-beta("pu"))+(1-bet
      a("du"))*((X(t,"lnKt")))**(-beta("pu"))]**(-1/beta("pu"));
 238  *LOGll(T)=[sum(M, (A.L(M)**q.L)*Z(M)*X(t,"co"))]*[sum[m,(d.L(M)**q.L)*Z(M)
      ]*X(t,"lnLt")**(-sum[m,(P.L(M)**q.L)*Z(M)])+(1-sum[m,(d.L(M)**q.L)*Z(M)])*
      X(t,"lnKt")**(-sum[m,((P.L(M))**q.L)*Z(M)])]**[-1/(sum(m,(P.L(M)**q.L)*(Z(
      M))))];
 239  AV_Y=(sum(t,(data("lnVAt",t))));
 240  ets(t)= (data("lnVAt",t)-logLL(T));
 241  etTT(t)=abs(data("lnVAt",t)-logLL(T));
 242  R_2=sum(t,etTT(t))/av_Y;
 243  *R_2=1-(ett/sum(t,sqr(data("lnVAt",t)-av_Y)));
 244  display obj2.l,logLL,Y, A.l,P.l, D.l,q.l,beta;
 245  *R_2,ett,ettt
 246
 247  parameter
 248  PPI parameter precision index
 249  *e(i,j) estimation of information divergence percentage
 250  S average percentage of SAM account information divergence
 251  god model goodness;
 252  display q.l, ALFA, R_2, ets,obj2.l;
 253  *display contsal1.l,contsal2.l, qtsal2.l


COMPILATION TIME     =        0.000 SECONDS      3 MB  24.1.3 r41464 WIN-VS8
GAMS 24.1.3  r41464 Released Jul 26, 2013 WIN-VS8 x86/MS Windows 02/27/14 17:19:33 Page 2
G e n e r a l   A l g e b r a i c   M o d e l i n g   S y s t e m
E x e c u t i o n


----    106 VARIABLE A.L  probabilities for posterior  alfa

                      ( ALL       0.000 )


----    106 VARIABLE P.L  probabilities for posterior p

                      ( ALL       0.000 )


----    106 VARIABLE D.L  probabilities for posterior d

                      ( ALL       0.000 )


----    158 VARIABLE qTsal1.L              =        0.961  varA
            VARIABLE qTsal2.L              =        0.961  varP
            VARIABLE qTsal3.L              =        0.961  varD

----    158 VARIABLE qTsal4.L  varW

1  0.971,    2  0.971,    3  0.971,    4  0.971,    5  0.971,    6  0.971
7  0.971,    8  0.971,    9  0.971,    10 0.971,    11 0.971,    12 0.971

GAMS 24.1.3  r41464 Released Jul 26, 2013 WIN-VS8 x86/MS Windows 02/27/14 17:19:33 Page 3
G e n e r a l   A l g e b r a i c   M o d e l i n g   S y s t e m
Equation Listing    SOLVE CESFrance Using DNLP From line 217


---- Entropy1  =E=  objective function Tsallis entropy parameter related probabi
                    lities

Entropy1..  - (1.97894663548959)*A(1) - (1.94494951678099)*A(2)

      - (1.13229563475716)*A(3) - (1.94494951678099)*A(4)

      - (1.97894663548959)*A(5) - (2.04945387194543)*P(1)

      - (2.01424548111629)*P(2) - (1.17263782217444)*P(3)

      - (2.01424548111629)*P(4) - (2.04945387194543)*P(5)

      - (2.05453722161959)*D(1) - (2.01924150188566)*D(2)

      - (1.17554636682278)*D(3) - (2.01924150188566)*D(4)

      - (2.05453722161959)*D(5) - (965.962301414586)*q + OBJ1 =E= 0 ;

      (LHS = 24.7422422321088, INFES = 24.7422422321088 ****)


---- Entropy2  =E=  objective function Tsallis entropy random error variable

Entropy2..  - (72969.7542139225)*q - (33.5413486490755)*W(1,1)

      - (39.5502022925352)*W(1,2) - (38.528892017575)*W(1,3)

      - (39.5502022925352)*W(1,4) - (33.5413486490755)*W(1,5)

      - (33.5413486490755)*W(2,1) - (39.5502022925352)*W(2,2)

      - (38.528892017575)*W(2,3) - (39.5502022925352)*W(2,4)

      - (33.5413486490755)*W(2,5) - (33.5413486490755)*W(3,1)

      - (39.5502022925352)*W(3,2) - (38.528892017575)*W(3,3)

      - (39.5502022925352)*W(3,4) - (33.5413486490755)*W(3,5)

      - (33.5413486490755)*W(4,1) - (39.5502022925352)*W(4,2)

      - (38.528892017575)*W(4,3) - (39.5502022925352)*W(4,4)

      - (33.5413486490755)*W(4,5) - (33.5413486490755)*W(5,1)

      - (39.5502022925352)*W(5,2) - (38.528892017575)*W(5,3)

      - (39.5502022925352)*W(5,4) - (33.5413486490755)*W(5,5)

      - (33.5413486490755)*W(6,1) - (39.5502022925352)*W(6,2)

      - (38.528892017575)*W(6,3) - (39.5502022925352)*W(6,4)

      - (33.5413486490755)*W(6,5) - (33.5413486490755)*W(7,1)

      - (39.5502022925352)*W(7,2) - (38.528892017575)*W(7,3)

      - (39.5502022925352)*W(7,4) - (33.5413486490755)*W(7,5)

      - (33.5413486490755)*W(8,1) - (39.5502022925352)*W(8,2)

      - (38.528892017575)*W(8,3) - (39.5502022925352)*W(8,4)

      - (33.5413486490755)*W(8,5) - (33.5413486490755)*W(9,1)

      - (39.5502022925352)*W(9,2) - (38.528892017575)*W(9,3)

      - (39.5502022925352)*W(9,4) - (33.5413486490755)*W(9,5)

      - (33.5413486490755)*W(10,1) - (39.5502022925352)*W(10,2)

      - (38.528892017575)*W(10,3) - (39.5502022925352)*W(10,4)

      - (33.5413486490755)*W(10,5) - (33.5413486490755)*W(11,1)

      - (39.5502022925352)*W(11,2) - (38.528892017575)*W(11,3)

      - (39.5502022925352)*W(11,4) - (33.5413486490755)*W(11,5)

      - (33.5413486490755)*W(12,1) - (39.5502022925352)*W(12,2)

      - (38.528892017575)*W(12,3) - (39.5502022925352)*W(12,4)

      - (33.5413486490755)*W(12,5) + OBJ2 =E= 0 ;

      (LHS = 1832.49906454346, INFES = 1832.49906454346 ****)


---- ADD1  =E=  parameter additivity constraints A

ADD1..  A(1) + A(2) + A(3) + A(4) + A(5) =E= 1 ; (LHS = 1)


---- ADD2  =E=  error additivity constraints P

ADD2..  P(1) + P(2) + P(3) + P(4) + P(5) =E= 1 ; (LHS = 1)


---- ADD3  =E=  parameter additivity constraints D

ADD3..  D(1) + D(2) + D(3) + D(4) + D(5) =E= 1 ; (LHS = 1)


---- ADD4  =E=  parameter additivity constraints W

ADD4(1)..  W(1,1) + W(1,2) + W(1,3) + W(1,4) + W(1,5) =E= 1 ; (LHS = 1)

ADD4(2)..  W(2,1) + W(2,2) + W(2,3) + W(2,4) + W(2,5) =E= 1 ; (LHS = 1)

ADD4(3)..  W(3,1) + W(3,2) + W(3,3) + W(3,4) + W(3,5) =E= 1 ; (LHS = 1)

REMAINING 9 ENTRIES SKIPPED


---- ADD5  =G=  errors additivity to zero W

ADD5..  - 5*D(1) - 2.5*D(2) - 1E-9*D(3) + 2.5*D(4) + 5*D(5) =G= 0.001 ;

      (LHS = -2.00000016548074E-10, INFES = 0.00100000020000002 ****)


---- ADD6  =L=  constraint of proportionality d

ADD6..  - 5*D(1) - 2.5*D(2) - 1E-9*D(3) + 2.5*D(4) + 5*D(5) =L= 0.999 ;

      (LHS = -2.00000016548074E-10)


---- ADD7  =L=  constraint of proportionality d

ADD7..  - 5*P(1) - 2.5*P(2) - 1E-9*P(3) + 2.5*P(4) + 5*P(5) =L= -1 ;

      (LHS = -2.00000016548074E-10, INFES = 0.9999999998 ****)


---- ADD9  =E=  contraining of elasticity parameter

ADD9..  - 1.35*W(1,1) - 0.45*W(1,2) + 0.45*W(1,4) + 1.35*W(1,5) - 1.35*W(2,1)

      - 0.45*W(2,2) + 0.45*W(2,4) + 1.35*W(2,5) - 1.35*W(3,1) - 0.45*W(3,2)

      + 0.45*W(3,4) + 1.35*W(3,5) - 1.35*W(4,1) - 0.45*W(4,2) + 0.45*W(4,4)

      + 1.35*W(4,5) - 1.35*W(5,1) - 0.45*W(5,2) + 0.45*W(5,4) + 1.35*W(5,5)

      - 1.35*W(6,1) - 0.45*W(6,2) + 0.45*W(6,4) + 1.35*W(6,5) - 1.35*W(7,1)

      - 0.45*W(7,2) + 0.45*W(7,4) + 1.35*W(7,5) - 1.35*W(8,1) - 0.45*W(8,2)

      + 0.45*W(8,4) + 1.35*W(8,5) - 1.35*W(9,1) - 0.45*W(9,2) + 0.45*W(9,4)

      + 1.35*W(9,5) - 1.35*W(10,1) - 0.45*W(10,2) + 0.45*W(10,4) + 1.35*W(10,5)

      - 1.35*W(11,1) - 0.45*W(11,2) + 0.45*W(11,4) + 1.35*W(11,5) - 1.35*W(12,1)

      - 0.45*W(12,2) + 0.45*W(12,4) + 1.35*W(12,5) =E= 0 ; (LHS = 0)


---- CON  =E=  consistency constraints

CON(1)..  - (29.3114662614262)*A(1) - (14.6557331307131)*A(2)

      - (5.86229325228525E-9)*A(3) + (14.6557331307131)*A(4)

      + (29.3114662614262)*A(5) + (1.12200234137004E-5)*P(1)

      + (5.61001170685019E-6)*P(2) + (2.24400468149139E-15)*P(3)

      - (5.61001170685019E-6)*P(4) - (1.12200234137004E-5)*P(5)

      - (3.90499048982268E-9)*D(1) - (1.95249524491134E-9)*D(2)

      - (7.80997532781735E-19)*D(3) + (1.95249524491134E-9)*D(4)

      + (3.90499048982268E-9)*D(5) + (1.8409720411698E-9)*q

      - (1.28081843994431)*W(1,1) - (0.463607454888643)*W(1,2)

      + (0.463607454888643)*W(1,4) + (1.28081843994431)*W(1,5)

      + (1.19082337928117E-9)*qTsal1 - (2.67041690659743E-15)*qTsal2

      + (1.58646092914998E-19)*qTsal3 - (1.04083408558608E-17)*qTsal4(1) =E=
     8.6907429 ; (LHS = -1.14386189409288E-9, INFES = 8.69074290114386 ****)

CON(2)..  - (29.1784757706947)*A(1) - (14.5892378853473)*A(2)

      - (5.83569515413893E-9)*A(3) + (14.5892378853473)*A(4)

      + (29.1784757706947)*A(5) + (1.44799658831362E-5)*P(1)

      + (7.23998294156812E-6)*P(2) + (2.89599317627341E-15)*P(3)

      - (7.23998294156812E-6)*P(4) - (1.44799658831362E-5)*P(5)

      - (3.23238720932259E-9)*D(1) - (1.61619360466129E-9)*D(2)

      - (6.46476319899114E-19)*D(3) + (1.61619360466129E-9)*D(4)

      + (3.23238720932259E-9)*D(5) + (1.83261906867147E-9)*q

      - (1.28081843994431)*W(2,1) - (0.463607454888643)*W(2,2)

      + (0.463607454888643)*W(2,4) + (1.28081843994431)*W(2,5)

      + (1.18542043614033E-9)*qTsal1 - (2.78706034858374E-15)*qTsal2

      + (1.31320763804708E-19)*qTsal3 - (1.04083408558608E-17)*qTsal4(2) =E=
     9.0260109 ; (LHS = -1.13867315576499E-9, INFES = 9.02601090113867 ****)

CON(3)..  - (29.4744336831297)*A(1) - (14.7372168415648)*A(2)

      - (5.89488673662594E-9)*A(3) + (14.7372168415648)*A(4)

      + (29.4744336831297)*A(5) + (1.440496674363E-5)*P(1)

      + (7.202483371815E-6)*P(2) + (2.88099334929527E-15)*P(3)

      - (7.202483371815E-6)*P(4) - (1.440496674363E-5)*P(5)

      - (3.16646107200639E-9)*D(1) - (1.5832305360032E-9)*D(2)

      - (6.33292328156134E-19)*D(3) + (1.5832305360032E-9)*D(4)

      + (3.16646107200639E-9)*D(5) + (1.85120737755152E-9)*q

      - (1.28081843994431)*W(3,1) - (0.463607454888643)*W(3,2)

      + (0.463607454888643)*W(3,4) + (1.28081843994431)*W(3,5)

      + (1.19744418132822E-9)*qTsal1 - (2.81920318008626E-15)*qTsal2

      + (1.28642279945423E-19)*qTsal3 - (1.04083408558608E-17)*qTsal4(3) =E=
     9.2124336 ; (LHS = -1.15022125157793E-9, INFES = 9.21243360115022 ****)

REMAINING 9 ENTRIES SKIPPED


---- conTsal1  =E=  Tsallis consistency A

conTsal1..  - (0.984576838972834)*A(1) - (0.984576838972834)*A(2)

      - (0.984576838972834)*A(3) - (0.984576838972834)*A(4)

      - (0.984576838972834)*A(5) + (1.54596613887552)*q + qTsal1 =E= 0 ;

      (LHS = 0)


---- conTsal2  =E=  Tsallis consistency P

conTsal2..  - (0.984576838972834)*P(1) - (0.984576838972834)*P(2)

      - (0.984576838972834)*P(3) - (0.984576838972834)*P(4)

      - (0.984576838972834)*P(5) + (1.54596613887552)*q + qTsal2 =E= 0 ;

      (LHS = 0)


---- conTsal3  =E=  Tsallis consistency D

conTsal3..  - (0.984576838972834)*D(1) - (0.984576838972834)*D(2)

      - (0.984576838972834)*D(3) - (0.984576838972834)*D(4)

      - (0.984576838972834)*D(5) + (1.54596613887552)*q + qTsal3 =E= 0 ;

      (LHS = 0)


---- conTsal4  =E=  Tsallis consistency W

conTsal4(1)..  (1.14645844290511)*q - (0.921065579691485)*W(1,1)

      - (1.00017189603751)*W(1,2) - (0.98717364556894)*W(1,3)

      - (1.00017189603751)*W(1,4) - (0.921065579691485)*W(1,5) + qTsal4(1) =E= 0
      ; (LHS = 0)

conTsal4(2)..  (1.14645844290511)*q - (0.921065579691485)*W(2,1)

      - (1.00017189603751)*W(2,2) - (0.98717364556894)*W(2,3)

      - (1.00017189603751)*W(2,4) - (0.921065579691485)*W(2,5) + qTsal4(2) =E= 0
      ; (LHS = 0)

conTsal4(3)..  (1.14645844290511)*q - (0.921065579691485)*W(3,1)

      - (1.00017189603751)*W(3,2) - (0.98717364556894)*W(3,3)

      - (1.00017189603751)*W(3,4) - (0.921065579691485)*W(3,5) + qTsal4(3) =E= 0
      ; (LHS = 0)

REMAINING 9 ENTRIES SKIPPED

GAMS 24.1.3  r41464 Released Jul 26, 2013 WIN-VS8 x86/MS Windows 02/27/14 17:19:33 Page 4
G e n e r a l   A l g e b r a i c   M o d e l i n g   S y s t e m
Column Listing      SOLVE CESFrance Using DNLP From line 217


---- A  probabilities for posterior  alfa

A(1)
                (.LO, .L, .UP, .M = 0.001, 0.2, 1, 0)
      (-1.9789) Entropy1
        1       ADD1
     (-29.3115) CON(1)
     (-29.1785) CON(2)
     (-29.4744) CON(3)
     (-29.6852) CON(4)
     (-29.961)  CON(5)
     (-29.7934) CON(6)
     (-29.5855) CON(7)
     (-29.2671) CON(8)
     (-29.7016) CON(9)
     (-29.7074) CON(10)
     (-30.362)  CON(11)
     (-29.175)  CON(12)
      (-0.9846) conTsal1

A(2)
                (.LO, .L, .UP, .M = 0.001, 0.2, 1, 0)
      (-1.9449) Entropy1
        1       ADD1
     (-14.6557) CON(1)
     (-14.5892) CON(2)
     (-14.7372) CON(3)
     (-14.8426) CON(4)
     (-14.9805) CON(5)
     (-14.8967) CON(6)
     (-14.7928) CON(7)
     (-14.6335) CON(8)
     (-14.8508) CON(9)
     (-14.8537) CON(10)
     (-15.181)  CON(11)
     (-14.5875) CON(12)
      (-0.9846) conTsal1

A(3)
                (.LO, .L, .UP, .M = 0.001, 0.2, 1, 0)
      (-1.1323) Entropy1
        1       ADD1
 (-5.862293E-9) CON(1)
 (-5.835695E-9) CON(2)
 (-5.894887E-9) CON(3)
 (-5.937034E-9) CON(4)
 (-5.992195E-9) CON(5)
 (-5.958673E-9) CON(6)
 (-5.917108E-9) CON(7)
 (-5.853416E-9) CON(8)
 (-5.940310E-9) CON(9)
 (-5.941485E-9) CON(10)
 (-6.072399E-9) CON(11)
 (-5.835002E-9) CON(12)
      (-0.9846) conTsal1

REMAINING 2 ENTRIES SKIPPED

---- P  probabilities for posterior p

P(1)
                (.LO, .L, .UP, .M = 0.001, 0.2, +INF, 0)
      (-2.0495) Entropy1
        1       ADD2
       -5       ADD7
 (1.1220023E-5) CON(1)
 (1.4479966E-5) CON(2)
 (1.4404967E-5) CON(3)
 (1.1980932E-5) CON(4)
 (-9.037175E-6) CON(5)
 (-1.432088E-5) CON(6)
 (1.0147332E-5) CON(7)
 (9.2261381E-6) CON(8)
 (-1.096660E-5) CON(9)
 (1.5187321E-5) CON(10)
 (-9.980076E-6) CON(11)
 (1.5014184E-5) CON(12)
      (-0.9846) conTsal2

P(2)
                (.LO, .L, .UP, .M = 0.001, 0.2, +INF, 0)
      (-2.0142) Entropy1
        1       ADD2
       -2.5     ADD7
 (5.6100117E-6) CON(1)
 (7.2399829E-6) CON(2)
 (7.2024834E-6) CON(3)
 (5.9904662E-6) CON(4)
 (-4.518588E-6) CON(5)
 (-7.160442E-6) CON(6)
 (5.0736661E-6) CON(7)
 (4.6130691E-6) CON(8)
 (-5.483302E-6) CON(9)
 (7.5936606E-6) CON(10)
 (-4.990038E-6) CON(11)
 (7.5070918E-6) CON(12)
      (-0.9846) conTsal2

P(3)
                (.LO, .L, .UP, .M = 0.001, 0.2, +INF, 0)
      (-1.1726) Entropy1
        1       ADD2
  -1.000000E-9  ADD7
 (2.244005E-15) CON(1)
 (2.895993E-15) CON(2)
 (2.880993E-15) CON(3)
 (2.396186E-15) CON(4)
 (-1.80744E-15) CON(5)
 (-2.86418E-15) CON(6)
 (2.029466E-15) CON(7)
 (1.845228E-15) CON(8)
 (-2.19332E-15) CON(9)
 (3.037464E-15) CON(10)
 (-1.99602E-15) CON(11)
 (3.002837E-15) CON(12)
      (-0.9846) conTsal2

REMAINING 2 ENTRIES SKIPPED

---- D  probabilities for posterior d

D(1)
                (.LO, .L, .UP, .M = 0.001, 0.2, 1, 0)
      (-2.0545) Entropy1
        1       ADD3
       -5       ADD5
       -5       ADD6
 (-3.904990E-9) CON(1)
 (-3.232387E-9) CON(2)
 (-3.166461E-9) CON(3)
 (-3.138509E-9) CON(4)
 (-3.029662E-9) CON(5)
 (-2.539628E-9) CON(6)
 (-2.128005E-9) CON(7)
 (-1.511534E-9) CON(8)
 (-1.280033E-9) CON(9)
 (-1.211920E-9) CON(10)
 (-2.157097E-9) CON(11)
 (-1.306082E-9) CON(12)
      (-0.9846) conTsal3

D(2)
                (.LO, .L, .UP, .M = 0.001, 0.2, 1, 0)
      (-2.0192) Entropy1
        1       ADD3
       -2.5     ADD5
       -2.5     ADD6
 (-1.952495E-9) CON(1)
 (-1.616194E-9) CON(2)
 (-1.583231E-9) CON(3)
 (-1.569255E-9) CON(4)
 (-1.514831E-9) CON(5)
 (-1.269814E-9) CON(6)
 (-1.064003E-9) CON(7)
 (-7.55767E-10) CON(8)
 (-6.40016E-10) CON(9)
 (-6.05960E-10) CON(10)
 (-1.078549E-9) CON(11)
 (-6.53041E-10) CON(12)
      (-0.9846) conTsal3

D(3)
                (.LO, .L, .UP, .M = 0.001, 0.2, 1, 0)
      (-1.1755) Entropy1
        1       ADD3
  -1.000000E-9  ADD5
  -1.000000E-9  ADD6
 (-7.80998E-19) CON(1)
 (-6.46476E-19) CON(2)
 (-6.33292E-19) CON(3)
 (-6.27702E-19) CON(4)
 (-6.05932E-19) CON(5)
 (-5.07925E-19) CON(6)
 (-4.25602E-19) CON(7)
 (-3.02307E-19) CON(8)
 (-2.56005E-19) CON(9)
 (-2.42384E-19) CON(10)
 (-4.31421E-19) CON(11)
 (-2.61217E-19) CON(12)
      (-0.9846) conTsal3

REMAINING 2 ENTRIES SKIPPED

---- q  parameter tsallis

q
                (.LO, .L, .UP, .M = 1.00000331, 1.025, +INF, 0)
    (-965.9623) Entropy1
  (-72969.7542) Entropy2
 (1.8409720E-9) CON(1)
 (1.8326191E-9) CON(2)
 (1.8512074E-9) CON(3)
 (1.8644432E-9) CON(4)
 (1.8817672E-9) CON(5)
 (1.8712404E-9) CON(6)
 (1.8581860E-9) CON(7)
 (1.8381844E-9) CON(8)
 (1.8654737E-9) CON(9)
 (1.8658407E-9) CON(10)
 (1.9069543E-9) CON(11)
 (1.8324013E-9) CON(12)
       (1.546)  conTsal1
       (1.546)  conTsal2
       (1.546)  conTsal3
       (1.1465) conTsal4(1)
       (1.1465) conTsal4(2)
       (1.1465) conTsal4(3)
       (1.1465) conTsal4(4)
       (1.1465) conTsal4(5)
       (1.1465) conTsal4(6)
       (1.1465) conTsal4(7)
       (1.1465) conTsal4(8)
       (1.1465) conTsal4(9)
       (1.1465) conTsal4(10)
       (1.1465) conTsal4(11)
       (1.1465) conTsal4(12)


---- W  error probabilities for posterior weights

W(1,1)
                (.LO, .L, .UP, .M = 0.001, 0.0138888888888889, 1, 0)
     (-33.5413) Entropy2
        1       ADD4(1)
       -1.35    ADD9
      (-1.2808) CON(1)
      (-0.9211) conTsal4(1)

W(1,2)
                (.LO, .L, .UP, .M = 0.001, 0.375, 1, 0)
     (-39.5502) Entropy2
        1       ADD4(1)
       -0.45    ADD9
      (-0.4636) CON(1)
      (-1.0002) conTsal4(1)

W(1,3)
                (.LO, .L, .UP, .M = 0.001, 0.222222222222222, 1, 0)
     (-38.5289) Entropy2
        1       ADD4(1)
      (-0.9872) conTsal4(1)

REMAINING 57 ENTRIES SKIPPED

---- OBJ1  objective1

OBJ1
                (.LO, .L, .UP, .M = -INF, 0, +INF, 0)
        1       Entropy1


---- OBJ2  objective2

OBJ2
                (.LO, .L, .UP, .M = -INF, 0, +INF, 0)
        1       Entropy2


---- qTsal1  varA

qTsal1
                (.LO, .L, .UP, .M = -INF, 0.960562769729594, +INF, 0)
 (1.1908234E-9) CON(1)
 (1.1854204E-9) CON(2)
 (1.1974442E-9) CON(3)
 (1.2060056E-9) CON(4)
 (1.2172107E-9) CON(5)
 (1.2104013E-9) CON(6)
 (1.2019581E-9) CON(7)
 (1.1890201E-9) CON(8)
 (1.2066712E-9) CON(9)
 (1.2069097E-9) CON(10)
 (1.2335028E-9) CON(11)
 (1.1852796E-9) CON(12)
        1       conTsal1


---- qTsal2  varP

qTsal2
                (.LO, .L, .UP, .M = -INF, 0.960562769729594, +INF, 0)
 (-2.67042E-15) CON(1)
 (-2.78706E-15) CON(2)
 (-2.81920E-15) CON(3)
 (-2.74586E-15) CON(4)
 (-1.92496E-15) CON(5)
 (-1.69024E-15) CON(6)
 (-2.65947E-15) CON(7)
 (-2.58414E-15) CON(8)
 (-1.81554E-15) CON(9)
 (-2.87878E-15) CON(10)
 (-1.93482E-15) CON(11)
 (-2.80835E-15) CON(12)
        1       conTsal2


---- qTsal3  varD

qTsal3
                (.LO, .L, .UP, .M = -INF, 0.960562769729594, +INF, 0)
 (1.586461E-19) CON(1)
 (1.313208E-19) CON(2)
 (1.286423E-19) CON(3)
 (1.275068E-19) CON(4)
 (1.230847E-19) CON(5)
 (1.031761E-19) CON(6)
 (8.645374E-20) CON(7)
 (6.140831E-20) CON(8)
 (5.200323E-20) CON(9)
 (4.923611E-20) CON(10)
 (8.763553E-20) CON(11)
 (5.306141E-20) CON(12)
        1       conTsal3


---- qTsal4  varW

qTsal4(1)
                (.LO, .L, .UP, .M = -INF, 0.970815608055712, +INF, 0)
 (-1.04083E-17) CON(1)
        1       conTsal4(1)

qTsal4(2)
                (.LO, .L, .UP, .M = -INF, 0.970815608055712, +INF, 0)
 (-1.04083E-17) CON(2)
        1       conTsal4(2)

qTsal4(3)
                (.LO, .L, .UP, .M = -INF, 0.970815608055712, +INF, 0)
 (-1.04083E-17) CON(3)
        1       conTsal4(3)

REMAINING 9 ENTRIES SKIPPED
GAMS 24.1.3  r41464 Released Jul 26, 2013 WIN-VS8 x86/MS Windows 02/27/14 17:19:33 Page 5
G e n e r a l   A l g e b r a i c   M o d e l i n g   S y s t e m
Model Statistics    SOLVE CESFrance Using DNLP From line 217


MODEL STATISTICS

BLOCKS OF EQUATIONS          15     SINGLE EQUATIONS           48
BLOCKS OF VARIABLES          11     SINGLE VARIABLES           93
NON ZERO ELEMENTS           610     NON LINEAR N-Z            455
DERIVATIVE POOL              10     CONSTANT POOL              61
CODE LENGTH               4,163


GENERATION TIME      =        0.016 SECONDS      4 MB  24.1.3 r41464 WIN-VS8


EXECUTION TIME       =        0.016 SECONDS      4 MB  24.1.3 r41464 WIN-VS8
GAMS 24.1.3  r41464 Released Jul 26, 2013 WIN-VS8 x86/MS Windows 02/27/14 17:19:33 Page 6
G e n e r a l   A l g e b r a i c   M o d e l i n g   S y s t e m
Solution Report     SOLVE CESFrance Using DNLP From line 217


               S O L V E      S U M M A R Y

     MODEL   CESFrance           OBJECTIVE  OBJ1
     TYPE    DNLP                DIRECTION  MINIMIZE
     SOLVER  MINOS5              FROM LINE  217

**** SOLVER STATUS     1 Normal Completion
**** MODEL STATUS      2 Locally Optimal
**** OBJECTIVE VALUE          -181271.4682

 RESOURCE USAGE, LIMIT          0.047    100000.000
 ITERATION COUNT, LIMIT        75    2000000000
 EVALUATION ERRORS              0             0

GAMS/MINOS       24.1.3 r41464 Released Jul 26, 2013 VS8 x86/MS Windows
M I N O S  5.51     (Jun 2004)

    GAMS/MINOS 5.51, Large Scale Nonlinear Solver
    B. A. Murtagh, University of New South Wales
    P. E. Gill, University of California at San Diego,
    W. Murray, M. A. Saunders, and M. H. Wright,
    Systems Optimization Laboratory, Stanford University

 Work space allocated           --     0.91 Mb

 EXIT - Optimal Solution found, objective:       -181271.5


                       LOWER     LEVEL     UPPER    MARGINAL

---- EQU Entropy1        .         .         .        1.000
---- EQU Entropy2        .         .         .         EPS
---- EQU ADD1           1.000     1.000     1.000 15105.079
---- EQU ADD2           1.000     1.000     1.000 15104.813
---- EQU ADD3           1.000     1.000     1.000 15104.840

  Entropy1  objective function Tsallis entropy parameter related probabilities
  Entropy2  objective function Tsallis entropy random error variable
  ADD1  parameter additivity constraints A
  ADD2  error additivity constraints P
  ADD3  parameter additivity constraints D

---- EQU ADD4  parameter additivity constraints W

      LOWER     LEVEL     UPPER    MARGINAL

1      1.000     1.000     1.000    -0.003
2      1.000     1.000     1.000    -0.002
3      1.000     1.000     1.000    -0.002
4      1.000     1.000     1.000    -0.001
5      1.000     1.000     1.000    -0.001
6      1.000     1.000     1.000 -4.188E-4
7      1.000     1.000     1.000 3.5601E-4
8      1.000     1.000     1.000     0.002
9      1.000     1.000     1.000     0.002
10     1.000     1.000     1.000     0.002
11     1.000     1.000     1.000 4.4536E-4
12     1.000     1.000     1.000     0.002

                       LOWER     LEVEL     UPPER    MARGINAL

---- EQU ADD5           0.001     0.001     +INF      0.204
---- EQU ADD6           -INF      0.001     0.999      .
---- EQU ADD7           -INF     -1.000    -1.000    -0.196
---- EQU ADD9            .         .         .       -0.003

  ADD5  errors additivity to zero W
  ADD6  constraint of proportionality d
  ADD7  constraint of proportionality d
  ADD9  contraining of elasticity parameter

---- EQU CON  consistency constraints

      LOWER     LEVEL     UPPER    MARGINAL

1      8.691     8.691     8.691     0.003
2      9.026     9.026     9.026     0.003
3      9.212     9.212     9.212     0.003
4      9.325     9.325     9.325     0.003
5      9.442     9.442     9.442     0.003
6      9.689     9.689     9.689     0.003
7      9.877     9.877     9.877     0.003
8     10.211    10.211    10.211     0.003
9     10.550    10.550    10.550     0.003
10    10.621    10.621    10.621     0.003
11    10.162    10.162    10.162     0.003
12    10.359    10.359    10.359     0.003

                       LOWER     LEVEL     UPPER    MARGINAL

---- EQU conTsal1        .         .         .        0.355
---- EQU conTsal2        .         .         .    2.3689E-5
---- EQU conTsal3        .         .         .    -1.151E-4

  conTsal1  Tsallis consistency A
  conTsal2  Tsallis consistency P
  conTsal3  Tsallis consistency D

---- EQU conTsal4  Tsallis consistency W

      LOWER     LEVEL     UPPER    MARGINAL

1       .         .         .       -0.003
2       .         .         .       -0.002
3       .         .         .       -0.002
4       .         .         .       -0.001
5       .         .         .       -0.001
6       .         .         .    -4.188E-4
7       .         .         .    3.5601E-4
8       .         .         .        0.002
9       .         .         .        0.002
10      .         .         .        0.002
11      .         .         .    4.4536E-4
12      .         .         .        0.002

---- VAR A  probabilities for posterior  alfa

     LOWER     LEVEL     UPPER    MARGINAL

1     0.001     0.001     1.000     1.518
2     0.001     0.001     1.000     0.958
3     0.001     0.657     1.000      .
4     0.001     0.003     1.000 -2.259E-4
5     0.001     0.338     1.000      .

---- VAR P  probabilities for posterior p

     LOWER     LEVEL     UPPER    MARGINAL

1     0.001     0.200     +INF       .
2     0.001     0.002     +INF  -1.350E-5
3     0.001     0.795     +INF       .
4     0.001     0.001     +INF      0.903
5     0.001     0.001     +INF      1.427

---- VAR D  probabilities for posterior d

     LOWER     LEVEL     UPPER    MARGINAL

1     0.001     0.001     1.000     0.871
2     0.001     0.001     1.000     0.614
3     0.001     0.996     1.000      .
4     0.001     0.001     1.000     0.169
5     0.001     0.001     1.000      .

                       LOWER     LEVEL     UPPER    MARGINAL

---- VAR q              1.000     1.000     +INF  5.476E+10

  q  parameter tsallis

---- VAR W  error probabilities for posterior weights

        LOWER     LEVEL     UPPER    MARGINAL

1 .1     0.001     0.588     1.000      .
1 .2     0.001     0.409     1.000      .
1 .3     0.001     0.001     1.000 5.9586E-8
1 .4     0.001     0.001     1.000 8.7423E-8
1 .5     0.001     0.001     1.000 1.4310E-7
2 .1     0.001     0.168     1.000      .
2 .2     0.001     0.829     1.000      .
2 .3     0.001     0.001     1.000 3.4264E-8
2 .4     0.001     0.001     1.000 5.8574E-8
2 .5     0.001     0.001     1.000 1.0719E-7
3 .1     0.001     0.069     1.000      .
3 .2     0.001     0.928     1.000      .
3 .3     0.001     0.001     1.000 2.3921E-8
3 .4     0.001     0.001     1.000 4.3805E-8
3 .5     0.001     0.001     1.000 8.3572E-8
4 .1     0.001     0.021     1.000      .
4 .2     0.001     0.976     1.000      .
4 .3     0.001     0.001     1.000 1.5180E-8
4 .4     0.001     0.001     1.000 2.9264E-8
4 .5     0.001     0.001     1.000 5.7432E-8
5 .1     0.001     0.001     1.000 -1.596E-8
5 .2     0.001     0.992     1.000      .
5 .3     0.001     0.001     1.000 6.9467E-9
5 .4     0.001     0.001     1.000 1.4581E-8
5 .5     0.001     0.005     1.000      .
6 .1     0.001     0.001     1.000 -7.000E-8
6 .2     0.001     0.824     1.000      .
6 .3     0.001     0.001     1.000 3.4796E-9
6 .4     0.001     0.001     1.000 2.7972E-8
6 .5     0.001     0.173     1.000      .
7 .1     0.001     0.001     1.000 -9.131E-8
7 .2     0.001     0.682     1.000      .
7 .3     0.001     0.001     1.000 -1.008E-8
7 .4     0.001     0.001     1.000 1.6999E-8
7 .5     0.001     0.315     1.000      .
8 .1     0.001     0.001     1.000 -1.173E-7
8 .2     0.001     0.438     1.000      .
8 .3     0.001     0.001     1.000 -3.345E-8
8 .4     0.001     0.001     1.000 -5.502E-9
8 .5     0.001     0.559     1.000      .
9 .1     0.001     0.001     1.000 -1.244E-7
9 .2     0.001     0.330     1.000      .
9 .3     0.001     0.001     1.000 -4.266E-8
9 .4     0.001     0.001     1.000 -1.542E-8
9 .5     0.001     0.667     1.000      .
10.1     0.001     0.001     1.000 -1.260E-7
10.2     0.001     0.291     1.000      .
10.3     0.001     0.001     1.000 -4.557E-8
10.4     0.001     0.001     1.000 -1.877E-8
10.5     0.001     0.706     1.000      .
11.1     0.001     0.001     1.000 -9.344E-8
11.2     0.001     0.666     1.000      .
11.3     0.001     0.001     1.000 -1.169E-8
11.4     0.001     0.001     1.000 1.5562E-8
11.5     0.001     0.331     1.000      .
12.1     0.001     0.001     1.000 -1.239E-7
12.2     0.001     0.339     1.000      .
12.3     0.001     0.001     1.000 -4.191E-8
12.4     0.001     0.001     1.000 -1.457E-8
12.5     0.001     0.658     1.000      .

                       LOWER     LEVEL     UPPER    MARGINAL

---- VAR OBJ1           -INF  -1.813E+5     +INF       .
---- VAR OBJ2           -INF  -1.378E+7     +INF       .
---- VAR qTsal1         -INF      1.000     +INF       .
---- VAR qTsal2         -INF      1.000     +INF       .
---- VAR qTsal3         -INF      1.000     +INF       .

  OBJ1  objective1
  OBJ2  objective2
  qTsal1  varA
  qTsal2  varP
  qTsal3  varD

---- VAR qTsal4  varW

      LOWER     LEVEL     UPPER    MARGINAL

1      -INF      1.000     +INF       .
2      -INF      1.000     +INF       .
3      -INF      1.000     +INF       .
4      -INF      1.000     +INF       .
5      -INF      1.000     +INF       .
6      -INF      1.000     +INF       .
7      -INF      1.000     +INF       .
8      -INF      1.000     +INF       .
9      -INF      1.000     +INF       .
10     -INF      1.000     +INF       .
11     -INF      1.000     +INF       .
12     -INF      1.000     +INF       .


**** REPORT SUMMARY :        0     NONOPT
                             0 INFEASIBLE
                             0  UNBOUNDED
                             0     ERRORS
GAMS 24.1.3  r41464 Released Jul 26, 2013 WIN-VS8 x86/MS Windows 02/27/14 17:19:33 Page 7
G e n e r a l   A l g e b r a i c   M o d e l i n g   S y s t e m
Equation Listing    SOLVE CESFrance Using DNLP From line 218


---- Entropy1  =E=  objective function Tsallis entropy parameter related probabi
                    lities

Entropy1..  - (15105.1916134654)*A(1) - (15105.1569574047)*A(2)

      - (15104.7237769958)*A(3) - (15105.24868194)*A(4)

      - (15105.7740434192)*A(5) - (15105.7916715325)*P(1)

      - (15105.3022739727)*P(2) - (15104.81290341)*P(3)

      - (15105.2269721693)*P(4) - (15105.2616283907)*P(5)

      - (15105.2665827796)*D(1) - (15105.231926547)*D(2)

      - (15104.8403216149)*D(3) - (15105.231926547)*D(4)

      - (15105.2848143913)*D(5) - (54764012765.398)*q + OBJ1 =E= 0 ; (LHS = 0)


---- Entropy2  =E=  objective function Tsallis entropy random error variable

Entropy2..  - (4162064968158.59)*q - (287011.483786256)*W(1,1)

      - (287010.793245031)*W(1,2) - (286999.367824805)*W(1,3)

      - (286999.367824805)*W(1,4) - (286999.367824805)*W(1,5)

      - (287009.097555565)*W(2,1) - (287012.13723612)*W(2,2)

      - (286999.367824805)*W(2,3) - (286999.367824805)*W(2,4)

      - (286999.367824805)*W(2,5) - (287007.410514312)*W(3,1)

      - (287012.350585346)*W(3,2) - (286999.367824805)*W(3,3)

      - (286999.367824805)*W(3,4) - (286999.367824805)*W(3,5)

      - (287005.165027454)*W(4,1) - (287012.445984663)*W(4,2)

      - (286999.367824805)*W(4,3) - (286999.367824805)*W(4,4)

      - (286999.367824805)*W(4,5) - (286999.367824805)*W(5,1)

      - (287012.476641161)*W(5,2) - (286999.367824805)*W(5,3)

      - (286999.367824805)*W(5,4) - (287002.525003317)*W(5,5)

      - (286999.367824805)*W(6,1) - (287012.124574201)*W(6,2)

      - (286999.367824805)*W(6,3) - (286999.367824805)*W(6,4)

      - (287009.15904446)*W(6,5) - (286999.367824805)*W(7,1)

      - (287011.765262419)*W(7,2) - (286999.367824805)*W(7,3)

      - (286999.367824805)*W(7,4) - (287010.297481729)*W(7,5)

      - (286999.367824805)*W(8,1) - (287010.925557318)*W(8,2)

      - (286999.367824805)*W(8,3) - (286999.367824805)*W(8,4)

      - (287011.386041505)*W(8,5) - (286999.367824805)*W(9,1)

      - (287010.384925993)*W(9,2) - (286999.367824805)*W(9,3)

      - (286999.367824805)*W(9,4) - (287011.723475991)*W(9,5)

      - (286999.367824805)*W(10,1) - (287010.148099892)*W(10,2)

      - (286999.367824805)*W(10,3) - (286999.367824805)*W(10,4)

      - (287011.830480417)*W(10,5) - (286999.367824805)*W(11,1)

      - (287011.719091138)*W(11,2) - (286999.367824805)*W(11,3)

      - (286999.367824805)*W(11,4) - (287010.393764925)*W(11,5)

      - (286999.367824805)*W(12,1) - (287010.43936283)*W(12,2)

      - (286999.367824805)*W(12,3) - (286999.367824805)*W(12,4)

      - (287011.695977316)*W(12,5) + OBJ2 =E= 0 ;

      (LHS = -1.86264514923096E-9, INFES = 1.86264514923096E-9 ****)


---- ADD1  =E=  parameter additivity constraints A

ADD1..  A(1) + A(2) + A(3) + A(4) + A(5) =E= 1 ; (LHS = 1)


---- ADD2  =E=  error additivity constraints P

ADD2..  P(1) + P(2) + P(3) + P(4) + P(5) =E= 1 ; (LHS = 1)


---- ADD3  =E=  parameter additivity constraints D

ADD3..  D(1) + D(2) + D(3) + D(4) + D(5) =E= 1 ; (LHS = 1)


---- ADD4  =E=  parameter additivity constraints W

ADD4(1)..  W(1,1) + W(1,2) + W(1,3) + W(1,4) + W(1,5) =E= 1 ; (LHS = 1)

ADD4(2)..  W(2,1) + W(2,2) + W(2,3) + W(2,4) + W(2,5) =E= 1 ; (LHS = 1)

ADD4(3)..  W(3,1) + W(3,2) + W(3,3) + W(3,4) + W(3,5) =E= 1 ; (LHS = 1)

REMAINING 9 ENTRIES SKIPPED


---- ADD5  =G=  errors additivity to zero W

ADD5..  - 5*D(1) - 2.5*D(2) - 1E-9*D(3) + 2.5*D(4) + 5*D(5) =G= 0.001 ;

      (LHS = 0.00100000000000009)


---- ADD6  =L=  constraint of proportionality d

ADD6..  - 5*D(1) - 2.5*D(2) - 1E-9*D(3) + 2.5*D(4) + 5*D(5) =L= 0.999 ;

      (LHS = 0.00100000000000011)


---- ADD7  =L=  constraint of proportionality d

ADD7..  - 5*P(1) - 2.5*P(2) - 1E-9*P(3) + 2.5*P(4) + 5*P(5) =L= -1 ; (LHS = -1)


---- ADD9  =E=  contraining of elasticity parameter

ADD9..  - 1.35*W(1,1) - 0.45*W(1,2) + 0.45*W(1,4) + 1.35*W(1,5) - 1.35*W(2,1)

      - 0.45*W(2,2) + 0.45*W(2,4) + 1.35*W(2,5) - 1.35*W(3,1) - 0.45*W(3,2)

      + 0.45*W(3,4) + 1.35*W(3,5) - 1.35*W(4,1) - 0.45*W(4,2) + 0.45*W(4,4)

      + 1.35*W(4,5) - 1.35*W(5,1) - 0.45*W(5,2) + 0.45*W(5,4) + 1.35*W(5,5)

      - 1.35*W(6,1) - 0.45*W(6,2) + 0.45*W(6,4) + 1.35*W(6,5) - 1.35*W(7,1)

      - 0.45*W(7,2) + 0.45*W(7,4) + 1.35*W(7,5) - 1.35*W(8,1) - 0.45*W(8,2)

      + 0.45*W(8,4) + 1.35*W(8,5) - 1.35*W(9,1) - 0.45*W(9,2) + 0.45*W(9,4)

      + 1.35*W(9,5) - 1.35*W(10,1) - 0.45*W(10,2) + 0.45*W(10,4) + 1.35*W(10,5)

      - 1.35*W(11,1) - 0.45*W(11,2) + 0.45*W(11,4) + 1.35*W(11,5) - 1.35*W(12,1)

      - 0.45*W(12,2) + 0.45*W(12,4) + 1.35*W(12,5) =E= 0 ; (LHS = 0)


---- CON  =E=  consistency constraints

CON(1)..  - (28.5821398142191)*A(1) - (14.2910699071095)*A(2)

      - (5.71655072122471E-9)*A(3) + (14.2911132975808)*A(4)

      + (28.5826908477422)*A(5) + (0.00696337325177769)*P(1)

      + (0.00348163421955105)*P(2) + (1.39268100439788E-12)*P(3)

      - (0.00348162554136828)*P(4) - (0.00696325108273655)*P(5)

      + (23.5161102639529)*D(1) + (11.7580551319764)*D(2)

      + (4.70332952611666E-9)*D(3) - (11.7580551319764)*D(4)

      - (23.5161244555747)*D(5) - (9.79975601730756)*q

      - (1.35000521804854)*W(1,1) - (0.450001198003684)*W(1,2)

      + (0.449992241016561)*W(1,4) + (1.34997672304968)*W(1,5)

      - (9.66690772743786)*qTsal1 - (0.00139267256074676)*qTsal2

      + (0.004703224028457)*qTsal3 + (0.976145600264676)*qTsal4(1) =E= 8.6907429
      ; (LHS = 8.6907429)

CON(2)..  - (28.4541917511989)*A(1) - (14.2270958755994)*A(2)

      - (5.6909605590923E-9)*A(3) + (14.2271390718331)*A(4)

      + (28.4547403180182)*A(5) + (0.00514478505551093)*P(1)

      + (0.00257235380810654)*P(2) + (1.02896170568688E-12)*P(3)

      - (0.00257234739634353)*P(4) - (0.00514469479268705)*P(5)

      + (20.4727105658514)*D(1) + (10.2363552829257)*D(2)

      + (4.09463567755119E-9)*D(3) - (10.2363552829257)*D(4)

      - (20.4727229208268)*D(5) - (9.86837257391537)*q

      - (1.34999860721787)*W(2,1) - (0.450001918679813)*W(2,2)

      + (0.449991908086597)*W(2,4) + (1.34997572425979)*W(2,5)

      - (9.6236337763915)*qTsal1 - (0.00102895546722399)*qTsal2

      + (0.0040945438331506)*qTsal3 + (0.597602427933365)*qTsal4(2) =E=
     9.0260109 ; (LHS = 9.0260109)

CON(3)..  - (28.7430825019762)*A(1) - (14.3715412509881)*A(2)

      - (5.74873995001424E-9)*A(3) + (14.371584885786)*A(4)

      + (28.7436366383047)*A(5) + (0.00493974768417378)*P(1)

      + (0.00246983666554416)*P(2) + (9.87954044329504E-13)*P(3)

      - (0.00246983050932238)*P(4) - (0.00493966101864477)*P(5)

      + (20.2084719459699)*D(1) + (10.1042359729849)*D(2)

      + (4.04178674595156E-9)*D(3) - (10.1042359729849)*D(4)

      - (20.2084841414813)*D(5) - (10.1674652295632)*q

      - (1.34999374270436)*W(3,1) - (0.450001786978162)*W(3,2)

      + (0.449991609138254)*W(3,4) + (1.34997482741476)*W(3,5)

      - (9.72134095469331)*qTsal1 - (0.000987948054482312)*qTsal2

      + (0.00404169608697474)*qTsal3 + (0.508886211505816)*qTsal4(3) =E=
     9.2124336 ; (LHS = 9.2124336)

REMAINING 9 ENTRIES SKIPPED


---- conTsal1  =E=  Tsallis consistency A

conTsal1..  - (0.999980445515739)*A(1) - (0.999980445515739)*A(2)

      - (1.00000191976176)*A(3) - (0.999983481651105)*A(4)

      - (0.999999724084507)*A(5) + (0.671438056657491)*q + qTsal1 =E= 0 ;

      (LHS = 0)


---- conTsal2  =E=  Tsallis consistency P

conTsal2..  - (0.999997990002571)*P(1) - (0.999982938038268)*P(2)

      - (1.00000255246447)*P(3) - (0.999980445515739)*P(4)

      - (0.999980445515739)*P(5) + (0.531082117771309)*q + qTsal2 =E= 0 ;

      (LHS = 0)


---- conTsal3  =E=  Tsallis consistency D

conTsal3..  - (0.999980445515739)*D(1) - (0.999980445515739)*D(2)

      - (1.00000329606868)*D(3) - (0.999980445515739)*D(4)

      - (0.999981048989024)*D(5) + (0.032984301727194)*q + qTsal3 =E= 0 ;

      (LHS = 0)


---- conTsal4  =E=  Tsallis consistency W

conTsal4(1)..  (0.698590702891258)*q - (1.00000155287349)*W(1,1)

      - (1.00000034988554)*W(1,2) - (0.999980445515739)*W(1,3)

      - (0.999980445515739)*W(1,4) - (0.999980445515739)*W(1,5) + qTsal4(1) =E=
     0 ; (LHS = 0)

conTsal4(2)..  (0.475069148087684)*q - (0.999997395828407)*W(2,1)

      - (1.00000269124346)*W(2,2) - (0.999980445515739)*W(2,3)

      - (0.999980445515739)*W(2,4) - (0.999980445515739)*W(2,5) + qTsal4(2) =E=
     0 ; (LHS = 0)

conTsal4(3)..  (0.274362007180048)*q - (0.999994456828646)*W(3,1)

      - (1.00000306291722)*W(3,2) - (0.999980445515739)*W(3,3)

      - (0.999980445515739)*W(3,4) - (0.999980445515739)*W(3,5) + qTsal4(3) =E=
     0 ; (LHS = 0)

REMAINING 9 ENTRIES SKIPPED

GAMS 24.1.3  r41464 Released Jul 26, 2013 WIN-VS8 x86/MS Windows 02/27/14 17:19:33 Page 8
G e n e r a l   A l g e b r a i c   M o d e l i n g   S y s t e m
Column Listing      SOLVE CESFrance Using DNLP From line 218


---- A  probabilities for posterior  alfa

A(1)
                (.LO, .L, .UP, .M = 0.001, 0.001, 1, 1.51807423719765)
  (-15105.1916) Entropy1
        1       ADD1
     (-28.5821) CON(1)
     (-28.4542) CON(2)
     (-28.7431) CON(3)
     (-28.9487) CON(4)
     (-29.2181) CON(5)
     (-29.0561) CON(6)
     (-28.8547) CON(7)
     (-28.5462) CON(8)
     (-28.971)  CON(9)
     (-28.977)  CON(10)
     (-29.6121) CON(11)
     (-28.4572) CON(12)
      (-1)      conTsal1

A(2)
                (.LO, .L, .UP, .M = 0.001, 0.001, 1, 0.958295478685613)
  (-15105.157)  Entropy1
        1       ADD1
     (-14.2911) CON(1)
     (-14.2271) CON(2)
     (-14.3715) CON(3)
     (-14.4744) CON(4)
     (-14.6091) CON(5)
     (-14.5281) CON(6)
     (-14.4274) CON(7)
     (-14.2731) CON(8)
     (-14.4855) CON(9)
     (-14.4885) CON(10)
     (-14.8061) CON(11)
     (-14.2286) CON(12)
      (-1)      conTsal1

A(3)
                (.LO, .L, .UP, .M = 0.001, 0.657039950414568, 1, 0)
  (-15104.7238) Entropy1
        1       ADD1
 (-5.716551E-9) CON(1)
 (-5.690961E-9) CON(2)
 (-5.748740E-9) CON(3)
 (-5.789871E-9) CON(4)
 (-5.843750E-9) CON(5)
 (-5.811349E-9) CON(6)
 (-5.771067E-9) CON(7)
 (-5.709372E-9) CON(8)
 (-5.794328E-9) CON(9)
 (-5.795522E-9) CON(10)
 (-5.922547E-9) CON(11)
 (-5.691564E-9) CON(12)
      (-1)      conTsal1

REMAINING 2 ENTRIES SKIPPED

---- P  probabilities for posterior p

P(1)
                (.LO, .L, .UP, .M = 0.001, 0.200438275247919, +INF, 0)
  (-15105.7917) Entropy1
        1       ADD2
       -5       ADD7
       (0.007)  CON(1)
       (0.0051) CON(2)
       (0.0049) CON(3)
       (0.0048) CON(4)
       (0.0045) CON(5)
       (0.0034) CON(6)
       (0.0025) CON(7)
       (0.0014) CON(8)
       (0.001)  CON(9)
       (0.0009) CON(10)
       (0.0025) CON(11)
       (0.001)  CON(12)
      (-1)      conTsal2

P(2)
                (.LO, .L, .UP, .M = 0.001, 0.00212344918598656, +INF,
-1.3497914551408E-5)
  (-15105.3023) Entropy1
        1       ADD2
       -2.5     ADD7
       (0.0035) CON(1)
       (0.0026) CON(2)
       (0.0025) CON(3)
       (0.0024) CON(4)
       (0.0023) CON(5)
       (0.0017) CON(6)
       (0.0012) CON(7)
       (0.0007) CON(8)
       (0.0005) CON(9)
       (0.0004) CON(10)
       (0.0013) CON(11)
       (0.0005) CON(12)
      (-1)      conTsal2

P(3)
                (.LO, .L, .UP, .M = 0.001, 0.795438275566094, +INF, 0)
  (-15104.8129) Entropy1
        1       ADD2
  -1.000000E-9  ADD7
 (1.392681E-12) CON(1)
 (1.028962E-12) CON(2)
 (9.879540E-13) CON(3)
 (9.689330E-13) CON(4)
 (9.077975E-13) CON(5)
 (6.748981E-13) CON(6)
 (4.980842E-13) CON(7)
 (2.713116E-13) CON(8)
 (1.971500E-13) CON(9)
 (1.780271E-13) CON(10)
 (5.001299E-13) CON(11)
 (2.078204E-13) CON(12)
      (-1)      conTsal2

REMAINING 2 ENTRIES SKIPPED

---- D  probabilities for posterior d

D(1)
                (.LO, .L, .UP, .M = 0.001, 0.001, 1, 0.870754293517166)
  (-15105.2666) Entropy1
        1       ADD3
       -5       ADD5
       -5       ADD6
      (23.5161) CON(1)
      (20.4727) CON(2)
      (20.2085) CON(3)
      (20.108)  CON(4)
      (19.6161) CON(5)
      (17.0567) CON(6)
      (14.7438) CON(7)
      (10.9886) CON(8)
       (9.4986) CON(9)
       (9.0432) CON(10)
      (14.9764) CON(11)
       (9.653)  CON(12)
      (-1)      conTsal3

D(2)
                (.LO, .L, .UP, .M = 0.001, 0.001, 1, 0.613851497695578)
  (-15105.2319) Entropy1
        1       ADD3
       -2.5     ADD5
       -2.5     ADD6
      (11.7581) CON(1)
      (10.2364) CON(2)
      (10.1042) CON(3)
      (10.054)  CON(4)
       (9.8081) CON(5)
       (8.5284) CON(6)
       (7.3719) CON(7)
       (5.4943) CON(8)
       (4.7493) CON(9)
       (4.5216) CON(10)
       (7.4882) CON(11)
       (4.8265) CON(12)
      (-1)      conTsal3

D(3)
                (.LO, .L, .UP, .M = 0.001, 0.99579999980084, 1, 0)
  (-15104.8403) Entropy1
        1       ADD3
  -1.000000E-9  ADD5
  -1.000000E-9  ADD6
 (4.7033295E-9) CON(1)
 (4.0946357E-9) CON(2)
 (4.0417867E-9) CON(3)
 (4.0216960E-9) CON(4)
 (3.9233107E-9) CON(5)
 (3.4114243E-9) CON(6)
 (2.9488278E-9) CON(7)
 (2.1977674E-9) CON(8)
 (1.8997692E-9) CON(9)
 (1.8086898E-9) CON(10)
 (2.9953442E-9) CON(11)
 (1.9306391E-9) CON(12)
      (-1)      conTsal3

REMAINING 2 ENTRIES SKIPPED

---- q  parameter tsallis

q
                (.LO, .L, .UP, .M = 1.00000331, 1.00000331, +INF,
54764012765.5401)
 (-5.47640E+10) Entropy1
 (-4.16206E+12) Entropy2
      (-9.7998) CON(1)
      (-9.8684) CON(2)
     (-10.1675) CON(3)
     (-10.4016) CON(4)
     (-10.6359) CON(5)
     (-10.8839) CON(6)
     (-10.8488) CON(7)
     (-10.6433) CON(8)
     (-10.7229) CON(9)
     (-10.696)  CON(10)
     (-11.1225) CON(11)
     (-10.543)  CON(12)
       (0.6714) conTsal1
       (0.5311) conTsal2
       (0.033)  conTsal3
       (0.6986) conTsal4(1)
       (0.4751) conTsal4(2)
       (0.2744) conTsal4(3)
       (0.1261) conTsal4(4)
       (0.0566) conTsal4(5)
       (0.4838) conTsal4(6)
       (0.6456) conTsal4(7)
       (0.7075) conTsal4(8)
       (0.6566) conTsal4(9)
       (0.6259) conTsal4(10)
       (0.6576) conTsal4(11)
       (0.6631) conTsal4(12)


---- W  error probabilities for posterior weights

W(1,1)
                (.LO, .L, .UP, .M = 0.001, 0.588103316080628, 1, 0)
 (-287011.4838) Entropy2
        1       ADD4(1)
       -1.35    ADD9
      (-1.35)   CON(1)
      (-1)      conTsal4(1)

W(1,2)
                (.LO, .L, .UP, .M = 0.001, 0.408896683919372, 1, 0)
 (-287010.7932) Entropy2
        1       ADD4(1)
       -0.45    ADD9
      (-0.45)   CON(1)
      (-1)      conTsal4(1)

W(1,3)
                (.LO, .L, .UP, .M = 0.001, 0.001, 1, 5.95862309858003E-8)
 (-286999.3678) Entropy2
        1       ADD4(1)
      (-1)      conTsal4(1)

REMAINING 57 ENTRIES SKIPPED

---- OBJ1  objective1

OBJ1
                (.LO, .L, .UP, .M = -INF, -181271.468181146, +INF, 0)
        1       Entropy1


---- OBJ2  objective2

OBJ2
                (.LO, .L, .UP, .M = -INF, -13776428.2319445, +INF, 0)
        1       Entropy2


---- qTsal1  varA

qTsal1
                (.LO, .L, .UP, .M = -INF, 0.999997777536205, +INF, 0)
      (-9.6669) CON(1)
      (-9.6236) CON(2)
      (-9.7213) CON(3)
      (-9.7909) CON(4)
      (-9.882)  CON(5)
      (-9.8272) CON(6)
      (-9.7591) CON(7)
      (-9.6548) CON(8)
      (-9.7984) CON(9)
      (-9.8005) CON(10)
     (-10.0153) CON(11)
      (-9.6247) CON(12)
        1       conTsal1


---- qTsal2  varP

qTsal2
                (.LO, .L, .UP, .M = -INF, 0.999998242114162, +INF, 0)
      (-0.0014) CON(1)
      (-0.001)  CON(2)
      (-0.001)  CON(3)
      (-0.001)  CON(4)
      (-0.0009) CON(5)
      (-0.0007) CON(6)
      (-0.0005) CON(7)
      (-0.0003) CON(8)
      (-0.0002) CON(9)
      (-0.0002) CON(10)
      (-0.0005) CON(11)
      (-0.0002) CON(12)
        1       conTsal2


---- qTsal3  varD

qTsal3
                (.LO, .L, .UP, .M = -INF, 0.99999989082088, +INF, 0)
       (0.0047) CON(1)
       (0.0041) CON(2)
       (0.004)  CON(3)
       (0.004)  CON(4)
       (0.0039) CON(5)
       (0.0034) CON(6)
       (0.0029) CON(7)
       (0.0022) CON(8)
       (0.0019) CON(9)
       (0.0018) CON(10)
       (0.003)  CON(11)
       (0.0019) CON(12)
        1       conTsal3


---- qTsal4  varW

qTsal4(1)
                (.LO, .L, .UP, .M = -INF, 0.99999768766129, +INF, 0)
       (0.9761) CON(1)
        1       conTsal4(1)

qTsal4(2)
                (.LO, .L, .UP, .M = -INF, 0.999998427517248, +INF, 0)
       (0.5976) CON(2)
        1       conTsal4(2)

qTsal4(3)
                (.LO, .L, .UP, .M = -INF, 0.999999091858243, +INF, 0)
       (0.5089) CON(3)
        1       conTsal4(3)

REMAINING 9 ENTRIES SKIPPED
GAMS 24.1.3  r41464 Released Jul 26, 2013 WIN-VS8 x86/MS Windows 02/27/14 17:19:33 Page 9
G e n e r a l   A l g e b r a i c   M o d e l i n g   S y s t e m
Model Statistics    SOLVE CESFrance Using DNLP From line 218


MODEL STATISTICS

BLOCKS OF EQUATIONS          15     SINGLE EQUATIONS           48
BLOCKS OF VARIABLES          11     SINGLE VARIABLES           93
NON ZERO ELEMENTS           610     NON LINEAR N-Z            455
DERIVATIVE POOL              10     CONSTANT POOL              61
CODE LENGTH               4,163


GENERATION TIME      =        0.000 SECONDS      3 MB  24.1.3 r41464 WIN-VS8


EXECUTION TIME       =        0.016 SECONDS      3 MB  24.1.3 r41464 WIN-VS8
GAMS 24.1.3  r41464 Released Jul 26, 2013 WIN-VS8 x86/MS Windows 02/27/14 17:19:33 Page 10
G e n e r a l   A l g e b r a i c   M o d e l i n g   S y s t e m
Solution Report     SOLVE CESFrance Using DNLP From line 218


               S O L V E      S U M M A R Y

     MODEL   CESFrance           OBJECTIVE  OBJ2
     TYPE    DNLP                DIRECTION  MINIMIZE
     SOLVER  MINOS5              FROM LINE  218

**** SOLVER STATUS     1 Normal Completion
**** MODEL STATUS      2 Locally Optimal
**** OBJECTIVE VALUE        -13776453.3868

 RESOURCE USAGE, LIMIT          0.094    100000.000
 ITERATION COUNT, LIMIT        66    2000000000
 EVALUATION ERRORS              0             0

GAMS/MINOS       24.1.3 r41464 Released Jul 26, 2013 VS8 x86/MS Windows
M I N O S  5.51     (Jun 2004)

    GAMS/MINOS 5.51, Large Scale Nonlinear Solver
    B. A. Murtagh, University of New South Wales
    P. E. Gill, University of California at San Diego,
    W. Murray, M. A. Saunders, and M. H. Wright,
    Systems Optimization Laboratory, Stanford University

 Work space allocated           --     0.91 Mb

 EXIT - Optimal Solution found, objective:      -0.1377645E+08


                       LOWER     LEVEL     UPPER    MARGINAL

---- EQU Entropy1        .         .         .         EPS
---- EQU Entropy2        .         .         .        1.000
---- EQU ADD1           1.000     1.000     1.000      EPS
---- EQU ADD2           1.000     1.000     1.000    -0.004
---- EQU ADD3           1.000     1.000     1.000     0.005

  Entropy1  objective function Tsallis entropy parameter related probabilities
  Entropy2  objective function Tsallis entropy random error variable
  ADD1  parameter additivity constraints A
  ADD2  error additivity constraints P
  ADD3  parameter additivity constraints D

---- EQU ADD4  parameter additivity constraints W

      LOWER     LEVEL     UPPER    MARGINAL

1      1.000     1.000     1.000 2.8701E+5
2      1.000     1.000     1.000 2.8701E+5
3      1.000     1.000     1.000 2.8701E+5
4      1.000     1.000     1.000 2.8701E+5
5      1.000     1.000     1.000 2.8701E+5
6      1.000     1.000     1.000 2.8701E+5
7      1.000     1.000     1.000 2.8701E+5
8      1.000     1.000     1.000 2.8701E+5
9      1.000     1.000     1.000 2.8701E+5
10     1.000     1.000     1.000 2.8701E+5
11     1.000     1.000     1.000 2.8701E+5
12     1.000     1.000     1.000 2.8701E+5

                       LOWER     LEVEL     UPPER    MARGINAL

---- EQU ADD5           0.001     0.504     +INF     -0.010
---- EQU ADD6           -INF      0.504     0.999      .
---- EQU ADD7           -INF     -1.000    -1.000    -0.004
---- EQU ADD9            .         .         .        0.002

  ADD5  errors additivity to zero W
  ADD6  constraint of proportionality d
  ADD7  constraint of proportionality d
  ADD9  contraining of elasticity parameter

---- EQU CON  consistency constraints

      LOWER     LEVEL     UPPER    MARGINAL

1      8.691     8.691     8.691    -0.072
2      9.026     9.026     9.026    -0.031
3      9.212     9.212     9.212     0.066
4      9.325     9.325     9.325     0.098
5      9.442     9.442     9.442    -0.019
6      9.689     9.689     9.689    -0.010
7      9.877     9.877     9.877    -0.024
8     10.211    10.211    10.211    -0.008
9     10.550    10.550    10.550    -0.039
10    10.621    10.621    10.621     0.003
11    10.162    10.162    10.162    -0.006
12    10.359    10.359    10.359     0.043

                       LOWER     LEVEL     UPPER    MARGINAL

---- EQU conTsal1        .         .         .         EPS
---- EQU conTsal2        .         .         .       -0.004
---- EQU conTsal3        .         .         .        0.005

  conTsal1  Tsallis consistency A
  conTsal2  Tsallis consistency P
  conTsal3  Tsallis consistency D

---- EQU conTsal4  Tsallis consistency W

      LOWER     LEVEL     UPPER    MARGINAL

1       .         .         .        0.002
2       .         .         .    3.4497E-4
3       .         .         .        0.002
4       .         .         .        0.004
5       .         .         .    1.3251E-4
6       .         .         .    2.2155E-5
7       .         .         .    2.8143E-4
8       .         .         .    3.5725E-5
9       .         .         .    6.3387E-4
10      .         .         .    -4.345E-6
11      .         .         .    2.3144E-5
12      .         .         .    8.1829E-4

---- VAR A  probabilities for posterior  alfa

     LOWER     LEVEL     UPPER    MARGINAL

1     0.001     0.001     1.000 1.998E-15
2     0.001     0.001     1.000 0.999E-15
3     0.001     0.592     1.000      .
4     0.001     0.001     1.000 -1.11E-15
5     0.001     0.405     1.000      .

---- VAR P  probabilities for posterior p

     LOWER     LEVEL     UPPER    MARGINAL

1     0.001     0.200     +INF       .
2     0.001     0.002     +INF  -8.385E-8
3     0.001     0.795     +INF       .
4     0.001     0.001     +INF  2.9069E-7
5     0.001     0.001     +INF  4.8721E-7

---- VAR D  probabilities for posterior d

     LOWER     LEVEL     UPPER    MARGINAL

1     0.001     0.001     1.000 -9.432E-7
2     0.001     0.001     1.000 -5.301E-7
3     0.001     0.895     1.000      .
4     0.001     0.001     1.000 2.9616E-7
5     0.001     0.102     1.000      .

                       LOWER     LEVEL     UPPER    MARGINAL

---- VAR q              1.000     1.000     +INF  4.162E+12

  q  parameter tsallis

---- VAR W  error probabilities for posterior weights

        LOWER     LEVEL     UPPER    MARGINAL

1 .1     0.001     0.210     1.000      .
1 .2     0.001     0.203     1.000      .
1 .3     0.001     0.202     1.000     0.023
1 .4     0.001     0.197     1.000     0.009
1 .5     0.001     0.188     1.000    -0.020
2 .1     0.001     0.203     1.000      .
2 .2     0.001     0.201     1.000      .
2 .3     0.001     0.201     1.000     0.018
2 .4     0.001     0.199     1.000     0.013
2 .5     0.001     0.196     1.000     0.004
3 .1     0.001     0.191     1.000      .
3 .2     0.001     0.197     1.000      .
3 .3     0.001     0.201     1.000     0.007
3 .4     0.001     0.204     1.000     0.005
3 .5     0.001     0.208     1.000    -0.015
4 .1     0.001     0.186     1.000      .
4 .2     0.001     0.195     1.000      .
4 .3     0.001     0.201     1.000     0.019
4 .4     0.001     0.203     1.000    -0.008
4 .5     0.001     0.215     1.000     0.012
5 .1     0.001     0.202     1.000    -0.001
5 .2     0.001     0.201     1.000      .
5 .3     0.001     0.200     1.000     0.003
5 .4     0.001     0.199     1.000     0.002
5 .5     0.001     0.198     1.000      .
6 .1     0.001     0.201     1.000    -0.009
6 .2     0.001     0.201     1.000      .
6 .3     0.001     0.199     1.000    -0.010
6 .4     0.001     0.200     1.000 5.1764E-5
6 .5     0.001     0.199     1.000      .
7 .1     0.001     0.204     1.000     0.016
7 .2     0.001     0.201     1.000      .
7 .3     0.001     0.200     1.000     0.004
7 .4     0.001     0.199     1.000     0.005
7 .5     0.001     0.196     1.000      .
8 .1     0.001     0.201     1.000     0.009
8 .2     0.001     0.200     1.000      .
8 .3     0.001     0.201     1.000     0.015
8 .4     0.001     0.198     1.000    -0.009
8 .5     0.001     0.199     1.000      .
9 .1     0.001     0.206     1.000     0.006
9 .2     0.001     0.201     1.000      .
9 .3     0.001     0.199     1.000    -0.009
9 .4     0.001     0.200     1.000     0.015
9 .5     0.001     0.194     1.000      .
10.1     0.001     0.202     1.000     0.025
10.2     0.001     0.200     1.000      .
10.3     0.001     0.199     1.000    -0.012
10.4     0.001     0.200     1.000    -0.003
10.5     0.001     0.200     1.000      .
11.1     0.001     0.202     1.000     0.018
11.2     0.001     0.200     1.000      .
11.3     0.001     0.200     1.000     0.003
11.4     0.001     0.200     1.000     0.002
11.5     0.001     0.199     1.000      .
12.1     0.001     0.194     1.000     0.006
12.2     0.001     0.197     1.000      .
12.3     0.001     0.199     1.000    -0.007
12.4     0.001     0.204     1.000     0.017
12.5     0.001     0.206     1.000      .

                       LOWER     LEVEL     UPPER    MARGINAL

---- VAR OBJ1           -INF  -1.813E+5     +INF       .
---- VAR OBJ2           -INF  -1.378E+7     +INF       .
---- VAR qTsal1         -INF      1.000     +INF       .
---- VAR qTsal2         -INF      1.000     +INF       .
---- VAR qTsal3         -INF      1.000     +INF       .

  OBJ1  objective1
  OBJ2  objective2
  qTsal1  varA
  qTsal2  varP
  qTsal3  varD

---- VAR qTsal4  varW

      LOWER     LEVEL     UPPER    MARGINAL

1      -INF      1.000     +INF       .
2      -INF      1.000     +INF       .
3      -INF      1.000     +INF       .
4      -INF      1.000     +INF       .
5      -INF      1.000     +INF       .
6      -INF      1.000     +INF       .
7      -INF      1.000     +INF       .
8      -INF      1.000     +INF       .
9      -INF      1.000     +INF       .
10     -INF      1.000     +INF       .
11     -INF      1.000     +INF       .
12     -INF      1.000     +INF       .


**** REPORT SUMMARY :        0     NONOPT
                             0 INFEASIBLE
                             0  UNBOUNDED
                             0     ERRORS
GAMS 24.1.3  r41464 Released Jul 26, 2013 WIN-VS8 x86/MS Windows 02/27/14 17:19:33 Page 11
G e n e r a l   A l g e b r a i c   M o d e l i n g   S y s t e m
E x e c u t i o n


----    225 VARIABLE q.L                   =        1.000  parameter tsallis

----    244 VARIABLE OBJ2.L                =  -1.39577E+7  objective2

----    244 PARAMETER logLL  in sample pronostical Y

1   8.723,    2   9.037,    3   9.186,    4   9.281,    5   9.449,    6   9.691
7   9.888,    8  10.215,    9  10.566,    10 10.623,    11 10.166,    12 10.340


----    244 PARAMETER Y  dependent variables

         lnVAt

1        8.691
2        9.026
3        9.212
4        9.325
5        9.442
6        9.689
7        9.877
8       10.211
9       10.550
10      10.621
11      10.162
12      10.359


----    244 VARIABLE A.L  probabilities for posterior  alfa

1 0.001,    2 0.001,    3 0.592,    4 0.001,    5 0.405


----    244 VARIABLE P.L  probabilities for posterior p

1 0.200,    2 0.002,    3 0.795,    4 0.001,    5 0.001


----    244 VARIABLE D.L  probabilities for posterior d

1 0.001,    2 0.001,    3 0.895,    4 0.001,    5 0.102


----    244 VARIABLE q.L                   =        1.000  parameter tsallis

----    244 PARAMETER Beta  estimates

ao  2.021,    pu -1.000,    du  0.504


----    252 VARIABLE q.L                   =        1.000  parameter tsallis
            PARAMETER alfa                 =        0.050
            PARAMETER R_2                  =        0.002  determination coeffic
                                                           ient

----    252 PARAMETER ets  estimation of random term

1  -0.032,    2  -0.011,    3   0.027,    4   0.044,    5  -0.007,    6  -0.002
7  -0.012,    8  -0.004,    9  -0.016,    10 -0.002,    11 -0.004,    12  0.019


----    252 VARIABLE OBJ2.L                =  -1.39577E+7  objective2


EXECUTION TIME       =        0.000 SECONDS      3 MB  24.1.3 r41464 WIN-VS8


USER: GAMS Development Corporation, Washington, DC   G871201/0000CA-ANY
      Free Demo,  202-342-0180,  sales@gams.com,  www.gams.com   DC0000


**** FILE SUMMARY

Input      H:\OutputComputationBwanakare\Tsallis entropyCECS_DO_M27_2_2014.gms
Output     C:\Users\sbwanakare\Documents\gamsdir\projdir\Tsallis entropyCECS_DO_
           M27_2_2014.lst


GAMS 24.1.3  r41464 Released Jul 26, 2013 WIN-VS8 x86/MS Windows 02/27/14 17:12:43 Page 1
G e n e r a l   A l g e b r a i c   M o d e l i n g   S y s t e m
C o m p i l a t i o n


      Model CET (constat elasticity of transformation between local demand and e
      xport demand)
      Recent developments in information-theoretic built upon Tsallis non-additi
      ve statistics are powerful enough to put
      established theory in question and suggest new applications.
      Constant elasticity of substitution class of aggregating nonlinear functio
      ns(CES) remains intractable while trying
      to analytically estimate its parameters. In empirical research, various no
      nlinear approximation technics like the
      Taylor algorithm are applied and completed by least square methods approac
      hes. As it can be shown(Bwanakare,2014), such numerical
      approaches are not conceptually fitted  to this type of (non) ergodic mode
      ls and estimated parameters should remain
      biaised and inefficient.  Through this program we propose a power law(PL)-
       driven estimation  approach, thus moving
      away from Gaussian ergodic hypothesis to more general Levy instable time (
      or space) processes characterized by tail
      queues,  long memory and complex correlation and by plausible convergence,
       in relative long range, to  attraction basin
      of central theorem limit. Presented estimation  procedure could be seen as
       generalization to non-ergodic systems of
      Gibbs-Kullback-Leibler works on information divergence and of Golan(et,al.
      ) on cross-entropy econometrics. Technically
      we minimize Tsallis non-extensive relative entropy criterion function unde
      r consistency  moment-contraints restrictions
      -incorporating the reparameterized CES function, and regular normality con
      ditions. As such, the approach then encompasses
      Bayesian information processing rule while remaining fundamentally based u
      pon thermodynamics second law.Basically, this code GAMS
      is

  20  *Setting variables and parameters of a CES model
  21  SET
  22      M index /1*5/
  23      J index /1*5/
  24      N index /1*5/
  25      t index/1*12/
  26      k index /lnVAt,lnKt,lnLt,co,ao,pu,du/
  27  *    Y(t,*) index /lnVAt/
  28     var(k) index/lnKt,lnLt,co/
  29     par(k) index /ao,pu,du/
  30  *,lnLt,ao,t,pu,du/
  31  *Alias(t,k);
  32  ;
  33  *$ontext
  34
  35  *Attention:The next is the constat elasticity of transformation model(LNVA
      T:MO,LNKt:DMO, LNLT:EX):
  36  table data(k,T)
  37            1                2                3                4
         5                6                7                8                9
                  10                11             12
  38  LNVAT     8.6907429        9.0260109        9.2124336        9.324997
         9.4419172        9.6890636        9.8765029        10.210702        10.
      5497776     10.6213706        10.162134      10.3587449
  39  LNKt      5.7193083        5.6933583        5.7511062        5.7922256
         5.8460456        5.8133424        5.7727866        5.7106479         5.
      795427       5.7965673         5.924294       5.6926819
  40  LNLT      2.9714346        3.3326526        3.4613274        3.5327714
         3.5958716        3.8757212        4.1037163        4.5000541         4.
      7543506      4.8248033         4.237840       4.666063
  41  CO        1                1                1                1
         1                1                1                1                 1
                   1                 1              1
  42  ;
  43
  44  *display data;
  45  parameter e1(t) error term for period one
  46  *variable e1(t) error term for period one
  47  variable et(t) error term for period t
  48  variable ett(t) variance of error term in period t
  49  variable lamda1 coefficient of first order autocorrelation
  50
  51  Positive variables
  52           A(M) parameter probabilities for posterior  alfa
  53           P(M) parameter probabilities for posterior p
  54           D(M) parameter probabilities for posterior d
  55           q    parameter tsallis
  56           H(t,M) all variables together
  57           W(t,j) error probabilities for posterior weights
  58
  59           ;
  60
  61  *H.l(t,M) = A.l(M)or P.l(M) or D.l(M)
  62   ;
  63  *parameter
  64  *        V(t,j) support space for error
  65  *        A(M)  parameter probabilities for apriori alfa
  66  *        P(M)  parameter probabilities for aposteriori p
  67  *        D(M)  parameter probabilities for aposteriori d
  68
  69   parameter
  70           Beta(par)               estimates
  71           X(T,var)                explanatory variables
  72           Y(T,*)                  dependent variables
  73           epsilon                 positive small real
  74  *         sigma(k)               error on depedent var
  75           v(t,j)                  error support on Yt
  76           A0(M)                   a priori parameter A
  77           P0(M)                   a priori parameter P
  78           D0(M)                   a priori parameter D
  79           W0(t,j)                 a priori weight W
  80
  81
  82           epsilon positive small real
  83           alfa /0.05/
  84            Z(M) parameter support /1 -5.00000
  85                                   2  -2.750
  86                                   3  -0.00000001
  87                                   4  2.750
  88                                   5  5.00/
  89           E(j) parameter support /1 -3.000
  90                                   2 -1.5
  91                                   3  0
  92                                   4  1.5
  93                                   5  3.00/
  94            epsilon /0.0010/;
  95             A.lo(M)=epsILON ;
  96  *          A.l(M)=0.0002;
  97            A.up(M)=1 ;
  98  *          P.lo(M)=epsilon;
  99            P.lo(M)=epsILON;
 100  *          P.l(M):=0.0002 ;
 101            D.lo(M)=epsILON  ;
 102  *          D.l(M)=0.0002;
 103            D.up(M)=1  ;
 104  *          H.lo(t,M)=epsilon ;
 105  *          H.l(t,M)=0.0002;
 106  *          H.up(t,M)=1 ;
 107            A0(M)=ABS(1.95/Z(M)) ;
 108  *          A.L(M)=ABS(2.0189/Z(M)) ;
 109            P0(M)=ABS(0.6/Z(M));
 110            D0(M)=ABS(0.5/Z(M))  ;
 111  *          A0(M)= .210;
 112  *          p0(M)= .220;
 113  *          d0(M)= .2150;
 114  DISPLAY A.L,P.L,D.L;
 115
 116            W.lo(t,j)=epSILON;
 117            W.up(t,j)=1;
 118            W0(t,j)=1/5;
 119  *          D.up(M)=1;
 120            q.l = 1.150;
 121  *          q.up =9/3;
 122  *          q.lO = 1.63 ;
 123  *          q.lO=1.008;
 124           q.lO=1.00000331;
 125  parameter
 126             sigmaa(k) Yt standard error /LnVat 0.450000/;
 127
 128            v(t,"1")  =(-3.0*sigmaa("lnVAt")) ;
 129            v(t,"2")  =( -1.0*sigmaa("lnVAt"));
 130            v(t,"3") = ( 0*sigmaa("lnVAt"));
 131            v(t,"4") = (1.0*sigmaa("lnVAt"));
 132            v(t,"5") = ( 3.0*sigmaa("lnVAt")) ;
 133
 134            W.L(t,"1")=1/72 ;
 135            W.L(t,"2")=27/72 ;
 136            W.L(t,"3")=16/72 ;
 137            W.L(t,"4")=27/72 ;
 138            W.L(t,"5")=1/72;
 139
 140            A.L(M)=1/5 ;
 141
 142            D.L(M)=1/5 ;
 143
 144            P.L(M)=1/5 ;
 145  Variable OBJ1 objective1
 146  Variable OBJ2 objective2
 147  Variable qTsal1 varA
 148  Variable qTsal2 varP
 149  Variable qTsal3 varD
 150  Variable qTsal4(t) varW  ;
 151  Variable OBJ objective ;
 152
 153  Y(t,"lnVAt") =(data("lnVAt",t));
 154  X(t,"lnKt") =(data("lnKt",t));
 155  X(t,"lnLt") =(data("lnLt",t));
 156  *X(t,"t") =data("t",t);
 157  X(t,"co") =(data("co",t));
 158  qTsal1.l=sum(m,A.l(m)**q.l);
 159  qTsal2.l=sum(m,P.l(m)**q.l);
 160  qTsal3.l=sum(m,D.l(m)**q.l);
 161  qTsal4.l(t)=sum(j,W.l(t,j)**q.l);
 162  *e1(t)=(X(t,"co"));
 163  *e1(t)=sum[j,(W.l(t,j))*V(t,j)];
 164  *et.l(t-1)=lamda1.L*e1(t-1)+e1(t-1);
 165  *et.l(t)=lamda1.L*et.l(t-1)+e1(t);
 166  *sigma1(t)= 0.05*Y(t,"lnVAt");
 167  display qTsal1.l,qTsal2.l,qTsal3.l,qTsal4.l;
 168  *,qTsal4.l;
 169
 170  Equations
 171           Entropy1  objective function entropy Csiszar type
 172           Entropy2 objective function entropy Bregman type
 173           ADD1   parameter additivity constraints A
 174           ADD2    error additivity constraints P
 175           ADD3   parameter additivity constraints D
 176           ADD4(t)   parameter additivity constraints W
 177           ADD5     errors additivity to zero W
 178           ADD6      constraint of proportionality d
 179           ADD7      constraint of proportionality d
 180  *        ADD8     contraining rest to sum to zero
 181           ADD9    contraining of elasticity parameter
 182  *         ADD11(T) autocorelation
 183           CON(T)      consistency constraints
 184           conTsal1    Tsallis consistency A
 185           conTsal2    Tsallis consistency P
 186          conTsal3    Tsallis consistency D
 187           conTsal4(t) Tsallis consistency W  ;
 188  ENTROPY2..OBJ2   =E= (1-alfa)*[SUM((t,j),(w(t,j)**q)*(w(t,j)/w0(t,j))**(q-
      1)-1)]/(q-1);
 189  ENTROPY1..OBJ1 =E=ALFA*[[SUM(m,(A(m)**q)*(A(m)/A0(m))**(q-1)-1)]/(q-1)+[SU
      M(m,(P(m)**q)*(P(m)/P0(m))**(q-1)-1)]/(q-1)+[SUM(m,(D(m)**q)*(D(m)/D0(m))*
      *(q-1)-1)]/(q-1)];
 190
 191  *ENTROPY1..     OBJ2 =E= ALFA*[[SUM(m,(A(m)**q)*(A(m)/A0(m))**(q-1)-1)]/(q
      -1)+[SUM(m,(P(m)**q)*(P(m)/P0(m))**(q-1)-1)]/(q-1)+[SUM(m,(D(m)**q)*(D(m)/
      D0(m))**(q-1)-1)]/(q-1)]+ (1-alfa)*[SUM((t,j),(w(t,j)**q)*(w(t,j)/w0(t,j))
      **(q-1)-1)]/(q-1);
 192  *ENTROPY1..     OBJ2   =E= ALFA*(-SUM(m, [A(m)*LOG(A(m) + epsILON)- LOG(A0
      (m) + epsILON)])-SUM(m, [P(m)*LOG(P(m) + epsILON)- LOG(P0(m) + epsILON)])-
      SUM(m, [D(m)*LOG(D(m) + epsILON)- LOG(D0(m) + epsILON)]))-(1-ALFA)* SUM((t
      ,j),(w(t,j)*LOG(w(t,j) + epsILON)- LOG(w(t,j) + epsILON))) ;
 193  *+(1-alfa)*[SUM((t,j),((w(t,j)**q)*(w0(t,j)**(1-q)))-1)/(q-1)];
 194  *ENTROPY1..     OBJ2 =E=alfa*[[1/(1-q)*SUM[m,  A(m)*[(  A(m))**(q-1)-( A0(
      m))**(q-1)]]-SUM(M,  (A(M)- A0(M))*( A0(M))**(q-1))]+[1/(1-q)*SUM[m,  P(M)
      *[(  P(m))**(q-1)-( P0(m))**(q-1)]]-SUM(M,  (P(M)- P0(M))*( P0(M))**(q-1))
      ]+[SUM[M,  D(M)*[(  D(M))**(q-1)-( D0(M))**(q-1)]]-SUM(M,  (D(M)- D0(M))*(
       D0(M))**(q-1))]]+[(1-alfa)/(1-q)*SUM[(t,j),  W(t,j)*[( W(t,j))**(q-1)-( W
      0(t,j))**(q-1)]]-SUM((t,j),  (W(t,j)- W0(t,j))*( W0(t,j))**(q-1))];
 195  *ADD8..SUM(T,et(t))=E=0;
 196
 197  *ADD11(T)..lamda1*et(t-1)+sum(J,(W(T,j)**q)*V(t,j))=e=et(t);
 198
 199  *ADD9(t)..SUM(j,W(t,j)*v(t,j))=E=0;
 200  ADD6.. sum(M, ((d(M)))*Z(M))=l=1-epsilon ;
 201  ADD5.. sum(M, ((d(M)))*Z(M))=g=epsilon ;
 202  *ADD7.. sum(M, d(M)*Z(M)) =g=0;
 203  ADD7.. sum(M, ((p(M)))*Z(M)) =l=-1;
 204  *ADD7..sum(M, ((p(M)**q)/qTsal2)*Z(M))=l=-1;
 205  ADD9.. sum(t,sum[j,(W(t,j))*V(t,j)])=e=0;
 206  *ADD8..sum(M,(A(M)**q)*Z(M))=g=0;
 207  conTsal1.. qTsal1=e=sum(m,A(m)**q);
 208  conTsal2.. qTsal2=e=sum(m,P(m)**q);
 209  conTsal3.. qTsal3=e=sum(m,D(m)**q);
 210  conTsal4(t).. qTsal4(t)=e=sum(j,W(t,j)**q);
 211  ADD1..sum(m, A(m)) =E=1;
 212  ADD2..sum(m, P(m)) =E=1;
 213  ADD3..sum(m, D(m)) =E=1;
 214  ADD4(t)..sum(j,W(t,j))=E=1;
 215  **CON(T)..[sum(M, (A(M)**q)*Z(M)*X(t,"co"))]*[sum[m,(d(M)**q)*Z(M)]*X(t,"l
      nLt")**(-sum[m,(P(M)**q)*Z(M)])+(1-sum[m,(d(M)**q)*Z(M)])*X(t,"lnKt")**(-s
      um[m,((P(M))**q)*Z(M)])]**[-1/(sum(m,(P(M)**q)*(Z(M))))]+sum[j,(W(t,j)**q)
      *V(t,j)]-(Y(T,"lnVAt"))=E=0;
 216  CON(T)..[sum(M, (A(M)**q)*Z(M)/qTsal1*X(t,"co"))]*[sum[m,(d(M)**q)*Z(M)/qT
      sal3]*X(t,"lnLt")**(-sum[m,(P(M)**q)*Z(M)/qTsal2])+(1-sum[m,(d(M)**q)*Z(M)
      /qTsal3])*X(t,"lnKt")**(-sum[m,((P(M))**q)*Z(M)/qTsal2])]**[-1/(sum(m,(P(M
      )**q)*(Z(M)/qTsal2)))]+sum[j,(W(t,j)**q)*V(t,j)/qTsal4(t)]-(Y(T,"lnVAt"))=
      E=0;
 217  *+sum[j,(W(t,j)**q)*V(t,j)*qtsal4(t)**(-1)]
 218  *CON(T)..[sum(M, (A(M))*Z(M)*X(t,"co"))]*[sum[m,(d(M))*Z(M)]*X(t,"lnLt")**
      (-sum[m,(P(M))*Z(M)])+(1-sum[m,(d(M))*Z(M)])*X(t,"lnKt")**(-sum[m,((P(M)))
      *Z(M)])]**[-1/(sum(m,(P(M))*(Z(M))))]+sum[j,(W(t,j)**q)*V(t,j)]-(Y(T,"lnVA
      t"))=E=0;
 219  Model CESFrance /ALL/;
 220  CESFrance.HOLDFIXED = 1 ;
 221  CESFrance.scaleopt=1 ;
 222  option reslim=100000;
 223  option DNLP = minos5;
 224  *option DNLP = conopt2;
 225  *option NLP = snopt;
 226  Solve CESFrance MINImising OBJ1 using DNLP;
 227  Solve CESFrance minimising OBJ2 using DNLP;
 228  OBJ2.L = ALFA*[[SUM(m,(A.L(m)**q.L)*(A.L(m)/A0(m))**(q.L-1)-1)]/(q.L-1)+[S
      UM(m,(P.L(m)**q.L)*(P.L(m)/P0(m))**(q.L-1)-1)]/(q.L-1)+[SUM(m,(D.L(m)**q.L
      )*(D.L(m)/D0(m))**(q.L-1)-1)]/(q.L-1)]+ (1-alfa)*[SUM((t,j),(w.L(t,j)**q.L
      )*(w.L(t,j)/w0(t,j))**(q.L-1)-1)]/(q.L-1);
 229  *SUM((t,m),W.l(t,m)*E(j))=0;
 230  *Solve CESFrance maximising OBJ2 using NLP;
 231  beta("ao") =(sum(M, (A.L(M))*Z(M))) ;
 232  beta("pu") = sum(M, (p.L(M))*Z(M)) ;
 233  beta("du") =  sum(M, (d.L(M))*Z(M)) ;
 234  DISPLAY q.l;
 235  *in sample teoretical yy
 236  parameter
 237  logLL(T) in sample pronostical Y
 238  AV_Y   average of Y
 239  ets(t) estimation of random term
 240  R_2  determination coefficient
 241  Etts  absolute value error total
 242  eTTT(t) total errors
 243  S(par) error on parameter
 244  etttt total errors;
 245  *S(par)=(1-sum(k,beta(par)**q.l))/[(q.l-1)]*(1-q.l)/3*(22**(1-q.l)-1);
 246  logLL(T) = (beta("ao")) *[beta("du")*((X(t,"lnLt")))**(-beta("pu"))+(1-bet
      a("du"))*((X(t,"lnKt")))**(-beta("pu"))]**(-1/beta("pu"));
 247  *LOGll(T)=[sum(M, (A.L(M)**q.L)*Z(M)*X(t,"co"))]*[sum[m,(d.L(M)**q.L)*Z(M)
      ]*X(t,"lnLt")**(-sum[m,(P.L(M)**q.L)*Z(M)])+(1-sum[m,(d.L(M)**q.L)*Z(M)])*
      X(t,"lnKt")**(-sum[m,((P.L(M))**q.L)*Z(M)])]**[-1/(sum(m,(P.L(M)**q.L)*(Z(
      M))))];
 248  AV_Y=(sum(t,(data("lnVAt",t))));
 249  ets(t)= (data("lnVAt",t)-logLL(T));
 250  etTT(t)=abs(data("lnVAt",t)-logLL(T));
 251  R_2=sum(t,etTT(t))/av_Y;
 252  *R_2=1-(ett/sum(t,sqr(data("lnVAt",t)-av_Y)));
 253  display obj2.l,logLL,Y, A.l,P.l, D.l,q.l,beta;
 254  *R_2,ett,ettt
 255
 256  parameter
 257  PPI parameter precision index
 258  *e(i,j) estimation of information divergence percentage
 259  S average percentage of SAM account information divergence
 260  god model goodness;
 261  display q.l, ALFA, R_2, ets,obj2.l;
 262  *display contsal1.l,contsal2.l, qtsal2.l


COMPILATION TIME     =        0.000 SECONDS      3 MB  24.1.3 r41464 WIN-VS8
GAMS 24.1.3  r41464 Released Jul 26, 2013 WIN-VS8 x86/MS Windows 02/27/14 17:12:43 Page 2
G e n e r a l   A l g e b r a i c   M o d e l i n g   S y s t e m
E x e c u t i o n


----    114 VARIABLE A.L  parameter probabilities for posterior  alfa

                      ( ALL       0.000 )


----    114 VARIABLE P.L  parameter probabilities for posterior p

                      ( ALL       0.000 )


----    114 VARIABLE D.L  parameter probabilities for posterior d

                      ( ALL       0.000 )


----    167 VARIABLE qTsal1.L              =        0.786  varA
            VARIABLE qTsal2.L              =        0.786  varP
            VARIABLE qTsal3.L              =        0.786  varD

----    167 VARIABLE qTsal4.L  varW

1  0.839,    2  0.839,    3  0.839,    4  0.839,    5  0.839,    6  0.839
7  0.839,    8  0.839,    9  0.839,    10 0.839,    11 0.839,    12 0.839

GAMS 24.1.3  r41464 Released Jul 26, 2013 WIN-VS8 x86/MS Windows 02/27/14 17:12:43 Page 3
G e n e r a l   A l g e b r a i c   M o d e l i n g   S y s t e m
Equation Listing    SOLVE CESFrance Using DNLP From line 226


---- Entropy1  =E=  objective function entropy Csiszar type

Entropy1..  - (0.307943757885047)*A(1) - (0.281530731438214)*A(2)

      - (0.0152625079996166)*A(3) - (0.281530731438214)*A(4)

      - (0.307943757885047)*A(5) - (0.36749709412593)*P(1)

      - (0.335976044526004)*P(2) - (0.0182141290262056)*P(3)

      - (0.335976044526004)*P(4) - (0.36749709412593)*P(5)

      - (0.377686182204767)*D(1) - (0.345291191678927)*D(2)

      - (0.0187191272095755)*D(3) - (0.345291191678927)*D(4)

      - (0.377686182204767)*D(5) - (27.9408785304921)*q + OBJ1 =E= 0 ;

      (LHS = 4.37168526646875, INFES = 4.37168526646875 ****)


---- Entropy2  =E=  objective function entropy Bregman type

Entropy2..  - (2033.27020716561)*q - (2.90550381664725)*W(1,1)

      - (7.80963217387418)*W(1,2) - (6.67509490924061)*W(1,3)

      - (7.80963217387418)*W(1,4) - (2.90550381664725)*W(1,5)

      - (2.90550381664725)*W(2,1) - (7.80963217387418)*W(2,2)

      - (6.67509490924061)*W(2,3) - (7.80963217387418)*W(2,4)

      - (2.90550381664725)*W(2,5) - (2.90550381664725)*W(3,1)

      - (7.80963217387418)*W(3,2) - (6.67509490924061)*W(3,3)

      - (7.80963217387418)*W(3,4) - (2.90550381664725)*W(3,5)

      - (2.90550381664725)*W(4,1) - (7.80963217387418)*W(4,2)

      - (6.67509490924061)*W(4,3) - (7.80963217387418)*W(4,4)

      - (2.90550381664725)*W(4,5) - (2.90550381664725)*W(5,1)

      - (7.80963217387418)*W(5,2) - (6.67509490924061)*W(5,3)

      - (7.80963217387418)*W(5,4) - (2.90550381664725)*W(5,5)

      - (2.90550381664725)*W(6,1) - (7.80963217387418)*W(6,2)

      - (6.67509490924061)*W(6,3) - (7.80963217387418)*W(6,4)

      - (2.90550381664725)*W(6,5) - (2.90550381664725)*W(7,1)

      - (7.80963217387418)*W(7,2) - (6.67509490924061)*W(7,3)

      - (7.80963217387418)*W(7,4) - (2.90550381664725)*W(7,5)

      - (2.90550381664725)*W(8,1) - (7.80963217387418)*W(8,2)

      - (6.67509490924061)*W(8,3) - (7.80963217387418)*W(8,4)

      - (2.90550381664725)*W(8,5) - (2.90550381664725)*W(9,1)

      - (7.80963217387418)*W(9,2) - (6.67509490924061)*W(9,3)

      - (7.80963217387418)*W(9,4) - (2.90550381664725)*W(9,5)

      - (2.90550381664725)*W(10,1) - (7.80963217387418)*W(10,2)

      - (6.67509490924061)*W(10,3) - (7.80963217387418)*W(10,4)

      - (2.90550381664725)*W(10,5) - (2.90550381664725)*W(11,1)

      - (7.80963217387418)*W(11,2) - (6.67509490924061)*W(11,3)

      - (7.80963217387418)*W(11,4) - (2.90550381664725)*W(11,5)

      - (2.90550381664725)*W(12,1) - (7.80963217387418)*W(12,2)

      - (6.67509490924061)*W(12,3) - (7.80963217387418)*W(12,4)

      - (2.90550381664725)*W(12,5) + OBJ2 =E= 0 ;

      (LHS = 311.495812362776, INFES = 311.495812362776 ****)


---- ADD1  =E=  parameter additivity constraints A

ADD1..  A(1) + A(2) + A(3) + A(4) + A(5) =E= 1 ; (LHS = 1)


---- ADD2  =E=  error additivity constraints P

ADD2..  P(1) + P(2) + P(3) + P(4) + P(5) =E= 1 ; (LHS = 1)


---- ADD3  =E=  parameter additivity constraints D

ADD3..  D(1) + D(2) + D(3) + D(4) + D(5) =E= 1 ; (LHS = 1)


---- ADD4  =E=  parameter additivity constraints W

ADD4(1)..  W(1,1) + W(1,2) + W(1,3) + W(1,4) + W(1,5) =E= 1 ; (LHS = 1)

ADD4(2)..  W(2,1) + W(2,2) + W(2,3) + W(2,4) + W(2,5) =E= 1 ; (LHS = 1)

ADD4(3)..  W(3,1) + W(3,2) + W(3,3) + W(3,4) + W(3,5) =E= 1 ; (LHS = 1)

REMAINING 9 ENTRIES SKIPPED


---- ADD5  =G=  errors additivity to zero W

ADD5..  - 5*D(1) - 2.75*D(2) - 1E-8*D(3) + 2.75*D(4) + 5*D(5) =G= 0.001 ;

      (LHS = -1.99999994343614E-9, INFES = 0.00100000199999994 ****)


---- ADD6  =L=  constraint of proportionality d

ADD6..  - 5*D(1) - 2.75*D(2) - 1E-8*D(3) + 2.75*D(4) + 5*D(5) =L= 0.999 ;

      (LHS = -1.99999994343614E-9)


---- ADD7  =L=  constraint of proportionality d

ADD7..  - 5*P(1) - 2.75*P(2) - 1E-8*P(3) + 2.75*P(4) + 5*P(5) =L= -1 ;

      (LHS = -1.99999994343614E-9, INFES = 0.999999998 ****)


---- ADD9  =E=  contraining of elasticity parameter

ADD9..  - 1.35*W(1,1) - 0.45*W(1,2) + 0.45*W(1,4) + 1.35*W(1,5) - 1.35*W(2,1)

      - 0.45*W(2,2) + 0.45*W(2,4) + 1.35*W(2,5) - 1.35*W(3,1) - 0.45*W(3,2)

      + 0.45*W(3,4) + 1.35*W(3,5) - 1.35*W(4,1) - 0.45*W(4,2) + 0.45*W(4,4)

      + 1.35*W(4,5) - 1.35*W(5,1) - 0.45*W(5,2) + 0.45*W(5,4) + 1.35*W(5,5)

      - 1.35*W(6,1) - 0.45*W(6,2) + 0.45*W(6,4) + 1.35*W(6,5) - 1.35*W(7,1)

      - 0.45*W(7,2) + 0.45*W(7,4) + 1.35*W(7,5) - 1.35*W(8,1) - 0.45*W(8,2)

      + 0.45*W(8,4) + 1.35*W(8,5) - 1.35*W(9,1) - 0.45*W(9,2) + 0.45*W(9,4)

      + 1.35*W(9,5) - 1.35*W(10,1) - 0.45*W(10,2) + 0.45*W(10,4) + 1.35*W(10,5)

      - 1.35*W(11,1) - 0.45*W(11,2) + 0.45*W(11,4) + 1.35*W(11,5) - 1.35*W(12,1)

      - 0.45*W(12,2) + 0.45*W(12,4) + 1.35*W(12,5) =E= 0 ; (LHS = 0)


---- CON  =E=  consistency constraints

CON(1)..  - (32.8860224039797)*A(1) - (18.0873123221888)*A(2)

      - (6.57720448079594E-8)*A(3) + (18.0873123221888)*A(4)

      + (32.8860224039797)*A(5) - (3.64088015382065E-7)*P(1)

      - (2.00248408078666E-7)*P(2) - (7.28176031286893E-16)*P(3)

      + (2.00248408078666E-7)*P(4) + (3.64088015382065E-7)*P(5)

      - (4.30677253904585E-8)*D(1) - (2.36872492187405E-8)*D(2)

      - (8.61354460948733E-17)*D(3) + (2.36872492187405E-8)*D(4)

      + (4.30677253904585E-8)*D(5) + (1.84097455146681E-8)*q

      - (0.973837017619615)*W(1,1) - (0.532193528109671)*W(1,2)

      + (0.532193528109671)*W(1,4) + (0.973837017619615)*W(1,5)

      + (1.45619319761394E-8)*qTsal1 + (1.61218187878831E-16)*qTsal2

      + (1.90703891827828E-17)*qTsal3 + (5.20417042793042E-18)*qTsal4(1) =E=
     8.6907429 ; (LHS = -1.14386153882151E-8, INFES = 8.69074291143862 ****)

CON(2)..  - (32.7368099522056)*A(1) - (18.0052454737131)*A(2)

      - (6.54736199044112E-8)*A(3) + (18.0052454737131)*A(4)

      + (32.7368099522056)*A(5) - (3.07857569723994E-7)*P(1)

      - (1.69321669833181E-7)*P(2) - (6.15715137035274E-16)*P(3)

      + (1.69321669833181E-7)*P(4) + (3.07857569723994E-7)*P(5)

      - (3.50631910221628E-8)*D(1) - (1.92847570848767E-8)*D(2)

      - (7.01263869396598E-17)*D(3) + (1.92847570848767E-8)*D(4)

      + (3.50631910221628E-8)*D(5) + (1.83262156620545E-8)*q

      - (0.973837017619615)*W(2,1) - (0.532193528109671)*W(2,2)

      + (0.532193528109671)*W(2,4) + (0.973837017619615)*W(2,5)

      + (1.44958606967966E-8)*qTsal1 + (1.363193421427E-16)*qTsal2

      + (1.55259823528906E-17)*qTsal3 + (5.20417042793042E-18)*qTsal4(2) =E=
     9.0260109 ; (LHS = -1.13867155704384E-8, INFES = 9.02601091138671 ****)

CON(3)..  - (33.0688601984558)*A(1) - (18.1878731091507)*A(2)

      - (6.61377203969115E-8)*A(3) + (18.1878731091507)*A(4)

      + (33.0688601984558)*A(5) - (4.85124985825788E-7)*P(1)

      - (2.6681874563741E-7)*P(2) - (9.70249977981498E-16)*P(3)

      + (2.6681874563741E-7)*P(4) + (4.85124985825788E-7)*P(5)

      - (3.35807618735377E-8)*D(1) - (1.84694190304458E-8)*D(2)

      - (6.71615325495064E-17)*D(3) + (1.84694190304458E-8)*D(4)

      + (3.35807618735377E-8)*D(5) + (1.85120990152748E-8)*q

      - (0.973837017619615)*W(3,1) - (0.532193528109671)*W(3,2)

      + (0.532193528109671)*W(3,4) + (0.973837017619615)*W(3,5)

      + (1.46428925585146E-8)*qTsal1 + (2.14813356709791E-16)*qTsal2

      + (1.4869564714593E-17)*qTsal3 + (5.20417042793042E-18)*qTsal4(3) =E=
     9.2124336 ; (LHS = -1.15022107394225E-8, INFES = 9.21243361150221 ****)

REMAINING 9 ENTRIES SKIPPED


---- conTsal1  =E=  Tsallis consistency A

conTsal1..  - (0.903342284766529)*A(1) - (0.903342284766529)*A(2)

      - (0.903342284766529)*A(3) - (0.903342284766529)*A(4)

      - (0.903342284766529)*A(5) + (1.26423767044182)*q + qTsal1 =E= 0 ;

      (LHS = 0)


---- conTsal2  =E=  Tsallis consistency P

conTsal2..  - (0.903342284766529)*P(1) - (0.903342284766529)*P(2)

      - (0.903342284766529)*P(3) - (0.903342284766529)*P(4)

      - (0.903342284766529)*P(5) + (1.26423767044182)*q + qTsal2 =E= 0 ;

      (LHS = 0)


---- conTsal3  =E=  Tsallis consistency D

conTsal3..  - (0.903342284766529)*D(1) - (0.903342284766529)*D(2)

      - (0.903342284766529)*D(3) - (0.903342284766529)*D(4)

      - (0.903342284766529)*D(5) + (1.26423767044182)*q + qTsal3 =E= 0 ;

      (LHS = 0)


---- conTsal4  =E=  Tsallis consistency W

conTsal4(1)..  (0.964257908664869)*q - (0.605477439800152)*W(1,1)

      - (0.992664590833778)*W(1,2) - (0.917732186153393)*W(1,3)

      - (0.992664590833778)*W(1,4) - (0.605477439800152)*W(1,5) + qTsal4(1) =E=
     0 ; (LHS = 0)

conTsal4(2)..  (0.964257908664869)*q - (0.605477439800152)*W(2,1)

      - (0.992664590833778)*W(2,2) - (0.917732186153393)*W(2,3)

      - (0.992664590833778)*W(2,4) - (0.605477439800152)*W(2,5) + qTsal4(2) =E=
     0 ; (LHS = 0)

conTsal4(3)..  (0.964257908664869)*q - (0.605477439800152)*W(3,1)

      - (0.992664590833778)*W(3,2) - (0.917732186153393)*W(3,3)

      - (0.992664590833778)*W(3,4) - (0.605477439800152)*W(3,5) + qTsal4(3) =E=
     0 ; (LHS = 0)

REMAINING 9 ENTRIES SKIPPED

GAMS 24.1.3  r41464 Released Jul 26, 2013 WIN-VS8 x86/MS Windows 02/27/14 17:12:43 Page 4
G e n e r a l   A l g e b r a i c   M o d e l i n g   S y s t e m
Column Listing      SOLVE CESFrance Using DNLP From line 226


---- A  parameter probabilities for posterior  alfa

A(1)
                (.LO, .L, .UP, .M = 0.001, 0.2, 1, 0)
      (-0.3079) Entropy1
        1       ADD1
     (-32.886)  CON(1)
     (-32.7368) CON(2)
     (-33.0689) CON(3)
     (-33.3053) CON(4)
     (-33.6148) CON(5)
     (-33.4267) CON(6)
     (-33.1935) CON(7)
     (-32.8362) CON(8)
     (-33.3237) CON(9)
     (-33.3303) CON(10)
     (-34.0647) CON(11)
     (-32.7329) CON(12)
      (-0.9033) conTsal1

A(2)
                (.LO, .L, .UP, .M = 0.001, 0.2, 1, 0)
      (-0.2815) Entropy1
        1       ADD1
     (-18.0873) CON(1)
     (-18.0052) CON(2)
     (-18.1879) CON(3)
     (-18.3179) CON(4)
     (-18.4881) CON(5)
     (-18.3847) CON(6)
     (-18.2564) CON(7)
     (-18.0599) CON(8)
     (-18.328)  CON(9)
     (-18.3316) CON(10)
     (-18.7356) CON(11)
     (-18.0031) CON(12)
      (-0.9033) conTsal1

A(3)
                (.LO, .L, .UP, .M = 0.001, 0.2, 1, 0)
      (-0.0153) Entropy1
        1       ADD1
 (-6.577204E-8) CON(1)
 (-6.547362E-8) CON(2)
 (-6.613772E-8) CON(3)
 (-6.661060E-8) CON(4)
 (-6.722952E-8) CON(5)
 (-6.685344E-8) CON(6)
 (-6.638704E-8) CON(7)
 (-6.567245E-8) CON(8)
 (-6.664741E-8) CON(9)
 (-6.666052E-8) CON(10)
 (-6.812938E-8) CON(11)
 (-6.546584E-8) CON(12)
      (-0.9033) conTsal1

REMAINING 2 ENTRIES SKIPPED

---- P  parameter probabilities for posterior p

P(1)
                (.LO, .L, .UP, .M = 0.001, 0.2, +INF, 0)
      (-0.3675) Entropy1
        1       ADD2
       -5       ADD7
 (-3.640880E-7) CON(1)
 (-3.078576E-7) CON(2)
 (-4.851250E-7) CON(3)
 (4.2660591E-7) CON(4)
 (-8.152306E-7) CON(5)
 (5.9057695E-7) CON(6)
 (-1.602300E-6) CON(7)
 (1.0778230E-6) CON(8)
 (5.9281577E-7) CON(9)
 (3.3788570E-7) CON(10)
 (-1.639933E-6) CON(11)
 (3.1250276E-7) CON(12)
      (-0.9033) conTsal2

P(2)
                (.LO, .L, .UP, .M = 0.001, 0.2, +INF, 0)
      (-0.336)  Entropy1
        1       ADD2
       -2.75    ADD7
 (-2.002484E-7) CON(1)
 (-1.693217E-7) CON(2)
 (-2.668187E-7) CON(3)
 (2.3463324E-7) CON(4)
 (-4.483768E-7) CON(5)
 (3.2481732E-7) CON(6)
 (-8.812653E-7) CON(7)
 (5.9280265E-7) CON(8)
 (3.2604866E-7) CON(9)
 (1.8583713E-7) CON(10)
 (-9.019634E-7) CON(11)
 (1.7187651E-7) CON(12)
      (-0.9033) conTsal2

P(3)
                (.LO, .L, .UP, .M = 0.001, 0.2, +INF, 0)
      (-0.0182) Entropy1
        1       ADD2
  -1.000000E-8  ADD7
 (-7.28176E-16) CON(1)
 (-6.15715E-16) CON(2)
 (-9.70250E-16) CON(3)
 (8.532118E-16) CON(4)
 (-1.63046E-15) CON(5)
 (1.181154E-15) CON(6)
 (-3.20460E-15) CON(7)
 (2.155646E-15) CON(8)
 (1.185632E-15) CON(9)
 (6.757714E-16) CON(10)
 (-3.27987E-15) CON(11)
 (6.250055E-16) CON(12)
      (-0.9033) conTsal2

REMAINING 2 ENTRIES SKIPPED

---- D  parameter probabilities for posterior d

D(1)
                (.LO, .L, .UP, .M = 0.001, 0.2, 1, 0)
      (-0.3777) Entropy1
        1       ADD3
       -5       ADD5
       -5       ADD6
 (-4.306773E-8) CON(1)
 (-3.506319E-8) CON(2)
 (-3.358076E-8) CON(3)
 (-3.293454E-8) CON(4)
 (-3.267213E-8) CON(5)
 (-2.710398E-8) CON(6)
 (-2.265536E-8) CON(7)
 (-1.564601E-8) CON(8)
 (-1.319679E-8) CON(9)
 (-1.223193E-8) CON(10)
 (-2.282387E-8) CON(11)
 (-1.301892E-8) CON(12)
      (-0.9033) conTsal3

D(2)
                (.LO, .L, .UP, .M = 0.001, 0.2, 1, 0)
      (-0.3453) Entropy1
        1       ADD3
       -2.75    ADD5
       -2.75    ADD6
 (-2.368725E-8) CON(1)
 (-1.928476E-8) CON(2)
 (-1.846942E-8) CON(3)
 (-1.811400E-8) CON(4)
 (-1.796967E-8) CON(5)
 (-1.490719E-8) CON(6)
 (-1.246045E-8) CON(7)
 (-8.605304E-9) CON(8)
 (-7.258234E-9) CON(9)
 (-6.727561E-9) CON(10)
 (-1.255313E-8) CON(11)
 (-7.160405E-9) CON(12)
      (-0.9033) conTsal3

D(3)
                (.LO, .L, .UP, .M = 0.001, 0.2, 1, 0)
      (-0.0187) Entropy1
        1       ADD3
  -1.000000E-8  ADD5
  -1.000000E-8  ADD6
 (-8.61354E-17) CON(1)
 (-7.01264E-17) CON(2)
 (-6.71615E-17) CON(3)
 (-6.58691E-17) CON(4)
 (-6.53443E-17) CON(5)
 (-5.42080E-17) CON(6)
 (-4.53107E-17) CON(7)
 (-3.12920E-17) CON(8)
 (-2.63936E-17) CON(9)
 (-2.44639E-17) CON(10)
 (-4.56477E-17) CON(11)
 (-2.60378E-17) CON(12)
      (-0.9033) conTsal3

REMAINING 2 ENTRIES SKIPPED

---- q  parameter tsallis

q
                (.LO, .L, .UP, .M = 1.00000331, 1.15, +INF, 0)
     (-27.9409) Entropy1
   (-2033.2702) Entropy2
 (1.8409746E-8) CON(1)
 (1.8326216E-8) CON(2)
 (1.8512099E-8) CON(3)
 (1.8644457E-8) CON(4)
 (1.8817697E-8) CON(5)
 (1.8712430E-8) CON(6)
 (1.8581886E-8) CON(7)
 (1.8381869E-8) CON(8)
 (1.8654762E-8) CON(9)
 (1.8658433E-8) CON(10)
 (1.9069569E-8) CON(11)
 (1.8324038E-8) CON(12)
       (1.2642) conTsal1
       (1.2642) conTsal2
       (1.2642) conTsal3
       (0.9643) conTsal4(1)
       (0.9643) conTsal4(2)
       (0.9643) conTsal4(3)
       (0.9643) conTsal4(4)
       (0.9643) conTsal4(5)
       (0.9643) conTsal4(6)
       (0.9643) conTsal4(7)
       (0.9643) conTsal4(8)
       (0.9643) conTsal4(9)
       (0.9643) conTsal4(10)
       (0.9643) conTsal4(11)
       (0.9643) conTsal4(12)


---- W  error probabilities for posterior weights

W(1,1)
                (.LO, .L, .UP, .M = 0.001, 0.0138888888888889, 1, 0)
      (-2.9055) Entropy2
        1       ADD4(1)
       -1.35    ADD9
      (-0.9738) CON(1)
      (-0.6055) conTsal4(1)

W(1,2)
                (.LO, .L, .UP, .M = 0.001, 0.375, 1, 0)
      (-7.8096) Entropy2
        1       ADD4(1)
       -0.45    ADD9
      (-0.5322) CON(1)
      (-0.9927) conTsal4(1)

W(1,3)
                (.LO, .L, .UP, .M = 0.001, 0.222222222222222, 1, 0)
      (-6.6751) Entropy2
        1       ADD4(1)
      (-0.9177) conTsal4(1)

REMAINING 57 ENTRIES SKIPPED

---- OBJ1  objective1

OBJ1
                (.LO, .L, .UP, .M = -INF, 0, +INF, 0)
        1       Entropy1


---- OBJ2  objective2

OBJ2
                (.LO, .L, .UP, .M = -INF, 0, +INF, 0)
        1       Entropy2


---- qTsal1  varA

qTsal1
                (.LO, .L, .UP, .M = -INF, 0.785515030231765, +INF, 0)
 (1.4561932E-8) CON(1)
 (1.4495861E-8) CON(2)
 (1.4642893E-8) CON(3)
 (1.4747587E-8) CON(4)
 (1.4884618E-8) CON(5)
 (1.4801353E-8) CON(6)
 (1.4698093E-8) CON(7)
 (1.4539882E-8) CON(8)
 (1.4755738E-8) CON(9)
 (1.4758641E-8) CON(10)
 (1.5083846E-8) CON(11)
 (1.4494139E-8) CON(12)
        1       conTsal1


---- qTsal2  varP

qTsal2
                (.LO, .L, .UP, .M = -INF, 0.785515030231765, +INF, 0)
 (1.612182E-16) CON(1)
 (1.363193E-16) CON(2)
 (2.148134E-16) CON(3)
 (-1.88901E-16) CON(4)
 (3.609841E-16) CON(5)
 (-2.61507E-16) CON(6)
 (7.094987E-16) CON(7)
 (-4.77260E-16) CON(8)
 (-2.62499E-16) CON(9)
 (-1.49616E-16) CON(10)
 (7.261626E-16) CON(11)
 (-1.38376E-16) CON(12)
        1       conTsal2


---- qTsal3  varD

qTsal3
                (.LO, .L, .UP, .M = -INF, 0.785515030231765, +INF, 0)
 (1.907039E-17) CON(1)
 (1.552598E-17) CON(2)
 (1.486956E-17) CON(3)
 (1.458341E-17) CON(4)
 (1.446722E-17) CON(5)
 (1.200164E-17) CON(6)
 (1.003179E-17) CON(7)
 (6.928053E-18) CON(8)
 (5.843539E-18) CON(9)
 (5.416299E-18) CON(10)
 (1.010641E-17) CON(11)
 (5.764778E-18) CON(12)
        1       conTsal3


---- qTsal4  varW

qTsal4(1)
                (.LO, .L, .UP, .M = -INF, 0.839354562356022, +INF, 0)
 (5.204170E-18) CON(1)
        1       conTsal4(1)

qTsal4(2)
                (.LO, .L, .UP, .M = -INF, 0.839354562356022, +INF, 0)
 (5.204170E-18) CON(2)
        1       conTsal4(2)

qTsal4(3)
                (.LO, .L, .UP, .M = -INF, 0.839354562356022, +INF, 0)
 (5.204170E-18) CON(3)
        1       conTsal4(3)

REMAINING 9 ENTRIES SKIPPED
GAMS 24.1.3  r41464 Released Jul 26, 2013 WIN-VS8 x86/MS Windows 02/27/14 17:12:43 Page 5
G e n e r a l   A l g e b r a i c   M o d e l i n g   S y s t e m
Model Statistics    SOLVE CESFrance Using DNLP From line 226


MODEL STATISTICS

BLOCKS OF EQUATIONS          15     SINGLE EQUATIONS           48
BLOCKS OF VARIABLES          11     SINGLE VARIABLES           93
NON ZERO ELEMENTS           610     NON LINEAR N-Z            455
DERIVATIVE POOL              10     CONSTANT POOL              60
CODE LENGTH               4,163


GENERATION TIME      =        0.015 SECONDS      4 MB  24.1.3 r41464 WIN-VS8


EXECUTION TIME       =        0.031 SECONDS      4 MB  24.1.3 r41464 WIN-VS8
GAMS 24.1.3  r41464 Released Jul 26, 2013 WIN-VS8 x86/MS Windows 02/27/14 17:12:43 Page 6
G e n e r a l   A l g e b r a i c   M o d e l i n g   S y s t e m
Solution Report     SOLVE CESFrance Using DNLP From line 226


               S O L V E      S U M M A R Y

     MODEL   CESFrance           OBJECTIVE  OBJ1
     TYPE    DNLP                DIRECTION  MINIMIZE
     SOLVER  MINOS5              FROM LINE  226

**** SOLVER STATUS     1 Normal Completion
**** MODEL STATUS      2 Locally Optimal
**** OBJECTIVE VALUE          -181271.1901

 RESOURCE USAGE, LIMIT          0.156    100000.000
 ITERATION COUNT, LIMIT       150    2000000000
 EVALUATION ERRORS              0             0

GAMS/MINOS       24.1.3 r41464 Released Jul 26, 2013 VS8 x86/MS Windows
M I N O S  5.51     (Jun 2004)

    GAMS/MINOS 5.51, Large Scale Nonlinear Solver
    B. A. Murtagh, University of New South Wales
    P. E. Gill, University of California at San Diego,
    W. Murray, M. A. Saunders, and M. H. Wright,
    Systems Optimization Laboratory, Stanford University

 Work space allocated           --     0.91 Mb

 EXIT - Optimal Solution found, objective:       -181271.2


                       LOWER     LEVEL     UPPER    MARGINAL

---- EQU Entropy1        .         .         .        1.000
---- EQU Entropy2        .         .         .         EPS
---- EQU ADD1           1.000     1.000     1.000 15105.160
---- EQU ADD2           1.000     1.000     1.000 15104.922
---- EQU ADD3           1.000     1.000     1.000 15104.953

  Entropy1  objective function entropy Csiszar type
  Entropy2  objective function entropy Bregman type
  ADD1  parameter additivity constraints A
  ADD2  error additivity constraints P
  ADD3  parameter additivity constraints D

---- EQU ADD4  parameter additivity constraints W

      LOWER     LEVEL     UPPER    MARGINAL

1      1.000     1.000     1.000    -0.003
2      1.000     1.000     1.000    -0.002
3      1.000     1.000     1.000    -0.001
4      1.000     1.000     1.000    -0.001
5      1.000     1.000     1.000    -0.001
6      1.000     1.000     1.000 -3.727E-4
7      1.000     1.000     1.000 3.1687E-4
8      1.000     1.000     1.000     0.001
9      1.000     1.000     1.000     0.002
10     1.000     1.000     1.000     0.002
11     1.000     1.000     1.000 3.9635E-4
12     1.000     1.000     1.000     0.002

                       LOWER     LEVEL     UPPER    MARGINAL

---- EQU ADD5           0.001     0.001     +INF      0.164
---- EQU ADD6           -INF      0.001     0.999      .
---- EQU ADD7           -INF     -1.000    -1.000    -0.173
---- EQU ADD9            .         .         .       -0.003

  ADD5  errors additivity to zero W
  ADD6  constraint of proportionality d
  ADD7  constraint of proportionality d
  ADD9  contraining of elasticity parameter

---- EQU CON  consistency constraints

      LOWER     LEVEL     UPPER    MARGINAL

1      8.691     8.691     8.691     0.003
2      9.026     9.026     9.026     0.003
3      9.212     9.212     9.212     0.003
4      9.325     9.325     9.325     0.003
5      9.442     9.442     9.442     0.003
6      9.689     9.689     9.689     0.003
7      9.877     9.877     9.877     0.003
8     10.211    10.211    10.211     0.003
9     10.550    10.550    10.550     0.003
10    10.621    10.621    10.621     0.003
11    10.162    10.162    10.162     0.003
12    10.359    10.359    10.359     0.003

                       LOWER     LEVEL     UPPER    MARGINAL

---- EQU conTsal1        .         .         .        0.316
---- EQU conTsal2        .         .         .    1.9377E-5
---- EQU conTsal3        .         .         .    -9.787E-5

  conTsal1  Tsallis consistency A
  conTsal2  Tsallis consistency P
  conTsal3  Tsallis consistency D

---- EQU conTsal4  Tsallis consistency W

      LOWER     LEVEL     UPPER    MARGINAL

1       .         .         .       -0.003
2       .         .         .       -0.002
3       .         .         .       -0.001
4       .         .         .       -0.001
5       .         .         .       -0.001
6       .         .         .    -3.727E-4
7       .         .         .    3.1688E-4
8       .         .         .        0.001
9       .         .         .        0.002
10      .         .         .        0.002
11      .         .         .    3.9636E-4
12      .         .         .        0.002

---- VAR A  parameter probabilities for posterior  alfa

     LOWER     LEVEL     UPPER    MARGINAL

1     0.001     0.001     1.000     1.288
2     0.001     0.001     1.000     0.837
3     0.001     0.655     1.000      .
4     0.001     0.007     1.000 4.3333E-4
5     0.001     0.336     1.000      .

---- VAR P  parameter probabilities for posterior p

     LOWER     LEVEL     UPPER    MARGINAL

1     0.001     0.199     +INF       .
2     0.001     0.005     +INF  -3.515E-4
3     0.001     0.794     +INF       .
4     0.001     0.001     +INF      0.778
5     0.001     0.001     +INF      1.197

---- VAR D  parameter probabilities for posterior d

     LOWER     LEVEL     UPPER    MARGINAL

1     0.001     0.001     1.000     0.641
2     0.001     0.001     1.000     0.462
3     0.001     0.996     1.000      .
4     0.001     0.001     1.000     0.100
5     0.001     0.001     1.000      .

                       LOWER     LEVEL     UPPER    MARGINAL

---- VAR q              1.000     1.000     +INF  5.476E+10

  q  parameter tsallis

---- VAR W  error probabilities for posterior weights

        LOWER     LEVEL     UPPER    MARGINAL

1 .1     0.001     0.860     1.000      .
1 .2     0.001     0.001     1.000 1.9024E-8
1 .3     0.001     0.001     1.000 3.9819E-8
1 .4     0.001     0.001     1.000 6.0614E-8
1 .5     0.001     0.137     1.000      .
2 .1     0.001     0.167     1.000      .
2 .2     0.001     0.830     1.000      .
2 .3     0.001     0.001     1.000 3.0490E-8
2 .4     0.001     0.001     1.000 5.2124E-8
2 .5     0.001     0.001     1.000 9.5391E-8
3 .1     0.001     0.532     1.000      .
3 .2     0.001     0.001     1.000 2.7182E-9
3 .3     0.001     0.001     1.000 2.7654E-8
3 .4     0.001     0.465     1.000      .
3 .5     0.001     0.001     1.000 1.0246E-7
4 .1     0.001     0.509     1.000      .
4 .2     0.001     0.001     1.000 7.210E-10
4 .3     0.001     0.001     1.000 2.5682E-8
4 .4     0.001     0.488     1.000      .
4 .5     0.001     0.001     1.000 1.0056E-7
5 .1     0.001     0.494     1.000      .
5 .2     0.001     0.001     1.000 -4.83E-10
5 .3     0.001     0.001     1.000 2.4479E-8
5 .4     0.001     0.503     1.000      .
5 .5     0.001     0.001     1.000 9.9366E-8
6 .1     0.001     0.326     1.000      .
6 .2     0.001     0.001     1.000 -1.423E-8
6 .3     0.001     0.001     1.000 9.9749E-9
6 .4     0.001     0.671     1.000      .
6 .5     0.001     0.001     1.000 8.2596E-8
7 .1     0.001     0.185     1.000      .
7 .2     0.001     0.001     1.000 -2.424E-8
7 .3     0.001     0.001     1.000 -2.170E-9
7 .4     0.001     0.812     1.000      .
7 .5     0.001     0.001     1.000 6.4037E-8
8 .1     0.001     0.098     1.000      .
8 .2     0.001     0.292     1.000 1.4090E-8
8 .3     0.001     0.001     1.000 -1.633E-8
8 .4     0.001     0.001     1.000 4.2647E-9
8 .5     0.001     0.607     1.000      .
9 .1     0.001     0.096     1.000      .
9 .2     0.001     0.001     1.000 -4.588E-8
9 .3     0.001     0.001     1.000 -2.603E-8
9 .4     0.001     0.375     1.000 9.7690E-9
9 .5     0.001     0.527     1.000      .
10.1     0.001     0.194     1.000      .
10.2     0.001     0.001     1.000 -5.758E-8
10.3     0.001     0.001     1.000 -3.529E-8
10.4     0.001     0.001     1.000 -1.299E-8
10.5     0.001     0.803     1.000      .
11.1     0.001     0.168     1.000      .
11.2     0.001     0.001     1.000 -2.516E-8
11.3     0.001     0.001     1.000 -3.485E-9
11.4     0.001     0.829     1.000      .
11.5     0.001     0.001     1.000 6.1540E-8
12.1     0.001     0.102     1.000      .
12.2     0.001     0.001     1.000 -4.591E-8
12.3     0.001     0.001     1.000 -2.583E-8
12.4     0.001     0.375     1.000 9.2859E-9
12.5     0.001     0.521     1.000      .

                       LOWER     LEVEL     UPPER    MARGINAL

---- VAR OBJ1           -INF  -1.813E+5     +INF       .
---- VAR OBJ2           -INF  -1.378E+7     +INF       .
---- VAR qTsal1         -INF      1.000     +INF       .
---- VAR qTsal2         -INF      1.000     +INF       .
---- VAR qTsal3         -INF      1.000     +INF       .

  OBJ1  objective1
  OBJ2  objective2
  qTsal1  varA
  qTsal2  varP
  qTsal3  varD

---- VAR qTsal4  varW

      LOWER     LEVEL     UPPER    MARGINAL

1      -INF      1.000     +INF       .
2      -INF      1.000     +INF       .
3      -INF      1.000     +INF       .
4      -INF      1.000     +INF       .
5      -INF      1.000     +INF       .
6      -INF      1.000     +INF       .
7      -INF      1.000     +INF       .
8      -INF      1.000     +INF       .
9      -INF      1.000     +INF       .
10     -INF      1.000     +INF       .
11     -INF      1.000     +INF       .
12     -INF      1.000     +INF       .


**** REPORT SUMMARY :        0     NONOPT
                             0 INFEASIBLE
                             0  UNBOUNDED
                             0     ERRORS
GAMS 24.1.3  r41464 Released Jul 26, 2013 WIN-VS8 x86/MS Windows 02/27/14 17:12:43 Page 7
G e n e r a l   A l g e b r a i c   M o d e l i n g   S y s t e m
Equation Listing    SOLVE CESFrance Using DNLP From line 227


---- Entropy1  =E=  objective function entropy Csiszar type

Entropy1..  - (15105.1964952123)*A(1) - (15105.1666044677)*A(2)

      - (15104.8434993149)*A(3) - (15105.3580178449)*A(4)

      - (15105.7782037595)*A(5) - (15105.7845118317)*P(1)

      - (15105.3958680647)*P(2) - (15104.9216400475)*P(3)

      - (15105.2255350948)*P(4) - (15105.255425956)*P(5)

      - (15105.264541744)*D(1) - (15105.2346508648)*D(2)

      - (15104.9534034562)*D(3) - (15105.2346508648)*D(4)

      - (15105.2827735026)*D(5) - (54764012759.9082)*q + OBJ1 =E= 0 ; (LHS = 0)


---- Entropy2  =E=  objective function entropy Bregman type

Entropy2..  - (4162064968157.12)*q - (287012.205855371)*W(1,1)

      - (286999.367824805)*W(1,2) - (286999.367824805)*W(1,3)

      - (286999.367824805)*W(1,4) - (287008.715589887)*W(1,5)

      - (287009.097078507)*W(2,1) - (287012.13733244)*W(2,2)

      - (286999.367824805)*W(2,3) - (286999.367824805)*W(2,4)

      - (286999.367824805)*W(2,5) - (287011.295004495)*W(3,1)

      - (286999.367824805)*W(3,2) - (286999.367824805)*W(3,3)

      - (287011.035578134)*W(3,4) - (286999.367824805)*W(3,5)

      - (287011.207836836)*W(4,1) - (286999.367824805)*W(4,2)

      - (286999.367824805)*W(4,3) - (287011.130813796)*W(4,4)

      - (286999.367824805)*W(4,5) - (287011.153321563)*W(5,1)

      - (286999.367824805)*W(5,2) - (286999.367824805)*W(5,3)

      - (287011.18596936)*W(5,4) - (286999.367824805)*W(5,5)

      - (287010.365591841)*W(6,1) - (286999.367824805)*W(6,2)

      - (286999.367824805)*W(6,3) - (287011.732961846)*W(6,4)

      - (286999.367824805)*W(6,5) - (287009.281235841)*W(7,1)

      - (286999.367824805)*W(7,2) - (286999.367824805)*W(7,3)

      - (287012.097888061)*W(7,4) - (286999.367824805)*W(7,5)

      - (287008.085997773)*W(8,1) - (287010.155821943)*W(8,2)

      - (286999.367824805)*W(8,3) - (286999.367824805)*W(8,4)

      - (287011.544770972)*W(8,5) - (287008.030957807)*W(9,1)

      - (286999.367824805)*W(9,2) - (286999.367824805)*W(9,3)

      - (287010.628824753)*W(9,4) - (287011.27697946)*W(9,5)

      - (287009.381058412)*W(10,1) - (286999.367824805)*W(10,2)

      - (286999.367824805)*W(10,3) - (286999.367824805)*W(10,4)

      - (287012.074470081)*W(10,5) - (287009.104751657)*W(11,1)

      - (286999.367824805)*W(11,2) - (286999.367824805)*W(11,3)

      - (287012.135779669)*W(11,4) - (286999.367824805)*W(11,5)

      - (287008.154372919)*W(12,1) - (286999.367824805)*W(12,2)

      - (286999.367824805)*W(12,3) - (287010.628824753)*W(12,4)

      - (287011.253738902)*W(12,5) + OBJ2 =E= 0 ;

      (LHS = -3.72529029846191E-9, INFES = 3.72529029846191E-9 ****)


---- ADD1  =E=  parameter additivity constraints A

ADD1..  A(1) + A(2) + A(3) + A(4) + A(5) =E= 1 ; (LHS = 1.00000000000011)


---- ADD2  =E=  error additivity constraints P

ADD2..  P(1) + P(2) + P(3) + P(4) + P(5) =E= 1 ; (LHS = 1)


---- ADD3  =E=  parameter additivity constraints D

ADD3..  D(1) + D(2) + D(3) + D(4) + D(5) =E= 1 ; (LHS = 1)


---- ADD4  =E=  parameter additivity constraints W

ADD4(1)..  W(1,1) + W(1,2) + W(1,3) + W(1,4) + W(1,5) =E= 1 ;

      (LHS = 1.00000000000012)

ADD4(2)..  W(2,1) + W(2,2) + W(2,3) + W(2,4) + W(2,5) =E= 1 ; (LHS = 1)

ADD4(3)..  W(3,1) + W(3,2) + W(3,3) + W(3,4) + W(3,5) =E= 1 ; (LHS = 1)

REMAINING 9 ENTRIES SKIPPED


---- ADD5  =G=  errors additivity to zero W

ADD5..  - 5*D(1) - 2.75*D(2) - 1E-8*D(3) + 2.75*D(4) + 5*D(5) =G= 0.001 ;

      (LHS = 0.00100000000000001)


---- ADD6  =L=  constraint of proportionality d

ADD6..  - 5*D(1) - 2.75*D(2) - 1E-8*D(3) + 2.75*D(4) + 5*D(5) =L= 0.999 ;

      (LHS = 0.001)


---- ADD7  =L=  constraint of proportionality d

ADD7..  - 5*P(1) - 2.75*P(2) - 1E-8*P(3) + 2.75*P(4) + 5*P(5) =L= -1 ;

      (LHS = -1)


---- ADD9  =E=  contraining of elasticity parameter

ADD9..  - 1.35*W(1,1) - 0.45*W(1,2) + 0.45*W(1,4) + 1.35*W(1,5) - 1.35*W(2,1)

      - 0.45*W(2,2) + 0.45*W(2,4) + 1.35*W(2,5) - 1.35*W(3,1) - 0.45*W(3,2)

      + 0.45*W(3,4) + 1.35*W(3,5) - 1.35*W(4,1) - 0.45*W(4,2) + 0.45*W(4,4)

      + 1.35*W(4,5) - 1.35*W(5,1) - 0.45*W(5,2) + 0.45*W(5,4) + 1.35*W(5,5)

      - 1.35*W(6,1) - 0.45*W(6,2) + 0.45*W(6,4) + 1.35*W(6,5) - 1.35*W(7,1)

      - 0.45*W(7,2) + 0.45*W(7,4) + 1.35*W(7,5) - 1.35*W(8,1) - 0.45*W(8,2)

      + 0.45*W(8,4) + 1.35*W(8,5) - 1.35*W(9,1) - 0.45*W(9,2) + 0.45*W(9,4)

      + 1.35*W(9,5) - 1.35*W(10,1) - 0.45*W(10,2) + 0.45*W(10,4) + 1.35*W(10,5)

      - 1.35*W(11,1) - 0.45*W(11,2) + 0.45*W(11,4) + 1.35*W(11,5) - 1.35*W(12,1)

      - 0.45*W(12,2) + 0.45*W(12,4) + 1.35*W(12,5) =E= 0 ;

      (LHS = -1.64979141459298E-13, INFES = 1.64979141459298E-13 ****)


---- CON  =E=  consistency constraints

CON(1)..  - (28.5823088476985)*A(1) - (15.7202698662342)*A(2)

      - (5.71658447542358E-8)*A(3) + (15.7203694699158)*A(4)

      + (28.5828592017865)*A(5) + (0.0067767075950827)*P(1)

      + (0.00372714491788977)*P(2) + (1.3553477374158E-11)*P(3)

      - (0.003727123903617)*P(4) - (0.00677658891565417)*P(5)

      + (23.2330801095439)*D(1) + (12.7781940602491)*D(2)

      + (4.64672220173043E-8)*D(3) - (12.7781940602491)*D(4)

      - (23.2330941304761)*D(5) - (10.8684430428716)*q

      - (1.35000568362616)*W(1,1) - (0.44999183015705)*W(1,2)

      + (0.44999183015705)*W(1,4) + (1.3499974751032)*W(1,5)

      - (9.66682385527652)*qTsal1 - (0.00135533942564559)*qTsal2

      + (0.00464661797300806)*qTsal3 + (0.976060205650463)*qTsal4(1) =E=
     8.6907429 ; (LHS = 8.69074289999996)

CON(2)..  - (28.4544968616466)*A(1) - (15.6499732739056)*A(2)

      - (5.69102152950727E-8)*A(3) + (15.6500724321879)*A(4)

      + (28.4550447547071)*A(5) + (0.0048656024244409)*P(1)

      + (0.00267604955566076)*P(2) + (9.73124949632642E-12)*P(3)

      - (0.00267603446764733)*P(4) - (0.00486551721390751)*P(5)

      + (19.9595982981308)*D(1) + (10.977779063972)*D(2)

      + (3.9920108789814E-8)*D(3) - (10.977779063972)*D(4)

      - (19.9596103435494)*D(5) - (10.1699260607706)*q

      - (1.34999860579526)*W(2,1) - (0.450001918655105)*W(2,2)

      + (0.449991907986383)*W(2,4) + (1.34997572395915)*W(2,5)

      - (9.62359655819776)*qTsal1 - (0.000973118981872853)*qTsal2

      + (0.00399192133582053)*qTsal3 + (0.597564581188447)*qTsal4(2) =E=
     9.0260109 ; (LHS = 9.02601089999999)

CON(3)..  - (28.7435859984244)*A(1) - (15.8089722991334)*A(2)

      - (5.74884059794305E-8)*A(3) + (15.809072464834)*A(4)

      + (28.7441394579138)*A(5) + (0.00449691040347953)*P(1)

      + (0.00247327135209795)*P(2) + (8.99386207122546E-12)*P(3)

      - (0.00247325740738583)*P(4) - (0.00449683164978149)*P(5)

      + (19.3599156206561)*D(1) + (10.6479535913609)*D(2)

      + (3.87207160281671E-8)*D(3) - (10.6479535913609)*D(4)

      - (19.3599273041722)*D(5) - (10.4535201283842)*q

      - (1.35000483606967)*W(3,1) - (0.449992261684156)*W(3,2)

      + (0.450001408647418)*W(3,4) + (1.34997678505247)*W(3,5)

      - (9.72136940708116)*qTsal1 - (0.000899380691563736)*qTsal2

      + (0.00387198474996461)*qTsal3 + (0.508914767020638)*qTsal4(3) =E=
     9.2124336 ; (LHS = 9.21243359999999)

REMAINING 9 ENTRIES SKIPPED


---- conTsal1  =E=  Tsallis consistency A

conTsal1..  - (0.999980445515739)*A(1) - (0.999980445515739)*A(2)

      - (1.00000191045146)*A(3) - (0.999986781395136)*A(4)

      - (0.999999700199785)*A(5) + (0.691166658592669)*q + qTsal1 =E= 0 ;

      (LHS = -1.10245146345278E-13, INFES = 1.10245146345278E-13 ****)


---- conTsal2  =E=  Tsallis consistency P

conTsal2..  - (0.999997958324425)*P(1) - (0.999986083602989)*P(2)

      - (1.00000254638396)*P(3) - (0.999980445515739)*P(4)

      - (0.999980445515739)*P(5) + (0.546553542630829)*q + qTsal2 =E= 0 ;

      (LHS = 0)


---- conTsal3  =E=  Tsallis consistency D

conTsal3..  - (0.999980445515739)*D(1) - (0.999980445515739)*D(2)

      - (1.00000329606867)*D(3) - (0.999980445515739)*D(4)

      - (0.999981048993967)*D(5) + (0.0329843137743963)*q + qTsal3 =E= 0 ;

      (LHS = 0)


---- conTsal4  =E=  Tsallis consistency W

conTsal4(1)..  (0.422749055612808)*q - (1.00000281078445)*W(1,1)

      - (0.999980445515739)*W(1,2) - (0.999980445515739)*W(1,3)

      - (0.999980445515739)*W(1,4) - (0.999996730405579)*W(1,5) + qTsal4(1) =E=
     0 ; (LHS = 0)

conTsal4(2)..  (0.475001866400579)*q - (0.999997394997324)*W(2,1)

      - (1.00000269141126)*W(2,2) - (0.999980445515739)*W(2,3)

      - (0.999980445515739)*W(2,4) - (0.999980445515739)*W(2,5) + qTsal4(2) =E=
     0 ; (LHS = 0)

conTsal4(3)..  (0.712466448010295)*q - (1.000001223998)*W(3,1)

      - (0.999980445515739)*W(3,2) - (0.999980445515739)*W(3,3)

      - (1.00000077205283)*W(3,4) - (0.999980445515739)*W(3,5) + qTsal4(3) =E= 0
      ; (LHS = 0)

REMAINING 9 ENTRIES SKIPPED

GAMS 24.1.3  r41464 Released Jul 26, 2013 WIN-VS8 x86/MS Windows 02/27/14 17:12:43 Page 8
G e n e r a l   A l g e b r a i c   M o d e l i n g   S y s t e m
Column Listing      SOLVE CESFrance Using DNLP From line 227


---- A  parameter probabilities for posterior  alfa

A(1)
                (.LO, .L, .UP, .M = 0.001, 0.001, 1, 1.2876748567196)
  (-15105.1965) Entropy1
        1       ADD1
     (-28.5823) CON(1)
     (-28.4545) CON(2)
     (-28.7436) CON(3)
     (-28.9493) CON(4)
     (-29.2185) CON(5)
     (-29.0565) CON(6)
     (-28.8551) CON(7)
     (-28.5467) CON(8)
     (-28.9714) CON(9)
     (-28.9775) CON(10)
     (-29.6125) CON(11)
     (-28.4578) CON(12)
      (-1)      conTsal1

A(2)
                (.LO, .L, .UP, .M = 0.001, 0.001, 1, 0.837175526137798)
  (-15105.1666) Entropy1
        1       ADD1
     (-15.7203) CON(1)
     (-15.65)   CON(2)
     (-15.809)  CON(3)
     (-15.9221) CON(4)
     (-16.0702) CON(5)
     (-15.9811) CON(6)
     (-15.8703) CON(7)
     (-15.7007) CON(8)
     (-15.9343) CON(9)
     (-15.9376) CON(10)
     (-16.2869) CON(11)
     (-15.6518) CON(12)
      (-1)      conTsal1

A(3)
                (.LO, .L, .UP, .M = 0.001, 0.655194442653331, 1, 0)
  (-15104.8435) Entropy1
        1       ADD1
 (-5.716584E-8) CON(1)
 (-5.691022E-8) CON(2)
 (-5.748841E-8) CON(3)
 (-5.789990E-8) CON(4)
 (-5.843820E-8) CON(5)
 (-5.811429E-8) CON(6)
 (-5.771142E-8) CON(7)
 (-5.709461E-8) CON(8)
 (-5.794410E-8) CON(9)
 (-5.795620E-8) CON(10)
 (-5.922632E-8) CON(11)
 (-5.691679E-8) CON(12)
      (-1)      conTsal1

REMAINING 2 ENTRIES SKIPPED

---- P  parameter probabilities for posterior p

P(1)
                (.LO, .L, .UP, .M = 0.001, 0.198529139714253, +INF, 0)
  (-15105.7845) Entropy1
        1       ADD2
       -5       ADD7
       (0.0068) CON(1)
       (0.0049) CON(2)
       (0.0045) CON(3)
       (0.0043) CON(4)
       (0.0042) CON(5)
       (0.0031) CON(6)
       (0.0023) CON(7)
       (0.0012) CON(8)
       (0.0008) CON(9)
       (0.0007) CON(10)
       (0.0023) CON(11)
       (0.0008) CON(12)
      (-1)      conTsal2

P(2)
                (.LO, .L, .UP, .M = 0.001, 0.00549247035961847, +INF,
-0.000351462942489889)
  (-15105.3959) Entropy1
        1       ADD2
       -2.75    ADD7
       (0.0037) CON(1)
       (0.0027) CON(2)
       (0.0025) CON(3)
       (0.0024) CON(4)
       (0.0023) CON(5)
       (0.0017) CON(6)
       (0.0012) CON(7)
       (0.0006) CON(8)
       (0.0005) CON(9)
       (0.0004) CON(10)
       (0.0012) CON(11)
       (0.0005) CON(12)
      (-1)      conTsal2

P(3)
                (.LO, .L, .UP, .M = 0.001, 0.793978389926128, +INF, 0)
  (-15104.9216) Entropy1
        1       ADD2
  -1.000000E-8  ADD7
 (1.355348E-11) CON(1)
 (9.731249E-12) CON(2)
 (8.993862E-12) CON(3)
 (8.662817E-12) CON(4)
 (8.492554E-12) CON(5)
 (6.188837E-12) CON(6)
 (4.538404E-12) CON(7)
 (2.339638E-12) CON(8)
 (1.683865E-12) CON(9)
 (1.460185E-12) CON(10)
 (4.506572E-12) CON(11)
 (1.667420E-12) CON(12)
      (-1)      conTsal2

REMAINING 2 ENTRIES SKIPPED

---- D  parameter probabilities for posterior d

D(1)
                (.LO, .L, .UP, .M = 0.001, 0.001, 1, 0.640508632610363)
  (-15105.2645) Entropy1
        1       ADD3
       -5       ADD5
       -5       ADD6
      (23.2331) CON(1)
      (19.9596) CON(2)
      (19.3599) CON(3)
      (19.1035) CON(4)
      (19.0251) CON(5)
      (16.3824) CON(6)
      (14.1119) CON(7)
      (10.2355) CON(8)
       (8.8022) CON(9)
       (8.2162) CON(10)
      (14.2588) CON(11)
       (8.68)   CON(12)
      (-1)      conTsal3

D(2)
                (.LO, .L, .UP, .M = 0.001, 0.001, 1, 0.462401098915507)
  (-15105.2347) Entropy1
        1       ADD3
       -2.75    ADD5
       -2.75    ADD6
      (12.7782) CON(1)
      (10.9778) CON(2)
      (10.648)  CON(3)
      (10.5069) CON(4)
      (10.4638) CON(5)
       (9.0103) CON(6)
       (7.7615) CON(7)
       (5.6295) CON(8)
       (4.8412) CON(9)
       (4.5189) CON(10)
       (7.8424) CON(11)
       (4.774)  CON(12)
      (-1)      conTsal3

D(3)
                (.LO, .L, .UP, .M = 0.001, 0.9957999980084, 1, 0)
  (-15104.9534) Entropy1
        1       ADD3
  -1.000000E-8  ADD5
  -1.000000E-8  ADD6
 (4.6467222E-8) CON(1)
 (3.9920109E-8) CON(2)
 (3.8720716E-8) CON(3)
 (3.8207919E-8) CON(4)
 (3.8050988E-8) CON(5)
 (3.2765640E-8) CON(6)
 (2.8224377E-8) CON(7)
 (2.0471427E-8) CON(8)
 (1.7604846E-8) CON(9)
 (1.6432757E-8) CON(10)
 (2.8518339E-8) CON(11)
 (1.7360367E-8) CON(12)
      (-1)      conTsal3

REMAINING 2 ENTRIES SKIPPED

---- q  parameter tsallis

q
                (.LO, .L, .UP, .M = 1.00000331, 1.00000331, +INF,
54764012760.0323)
 (-5.47640E+10) Entropy1
 (-4.16206E+12) Entropy2
     (-10.8684) CON(1)
     (-10.1699) CON(2)
     (-10.4535) CON(3)
     (-10.5168) CON(4)
     (-10.6097) CON(5)
     (-10.4937) CON(6)
     (-10.4483) CON(7)
     (-10.6181) CON(8)
     (-11.1515) CON(9)
     (-10.6478) CON(10)
     (-10.7421) CON(11)
     (-10.951)  CON(12)
       (0.6912) conTsal1
       (0.5466) conTsal2
       (0.033)  conTsal3
       (0.4227) conTsal4(1)
       (0.475)  conTsal4(2)
       (0.7125) conTsal4(3)
       (0.7146) conTsal4(4)
       (0.7147) conTsal4(5)
       (0.6542) conTsal4(6)
       (0.5013) conTsal4(7)
       (0.9043) conTsal4(8)
       (0.9434) conTsal4(9)
       (0.5157) conTsal4(10)
       (0.4761) conTsal4(11)
       (0.9541) conTsal4(12)


---- W  error probabilities for posterior weights

W(1,1)
                (.LO, .L, .UP, .M = 0.001, 0.860002532134796, 1, 0)
 (-287012.2059) Entropy2
        1       ADD4(1)
       -1.35    ADD9
      (-1.35)   CON(1)
      (-1)      conTsal4(1)

W(1,2)
                (.LO, .L, .UP, .M = 0.001, 0.001, 1, 1.90242743492147E-8)
 (-286999.3678) Entropy2
        1       ADD4(1)
       -0.45    ADD9
      (-0.45)   CON(1)
      (-1)      conTsal4(1)

W(1,3)
                (.LO, .L, .UP, .M = 0.001, 0.001, 1, 3.98188927863349E-8)
 (-286999.3678) Entropy2
        1       ADD4(1)
      (-1)      conTsal4(1)

REMAINING 57 ENTRIES SKIPPED

---- OBJ1  objective1

OBJ1
                (.LO, .L, .UP, .M = -INF, -181271.190089864, +INF, 0)
        1       Entropy1


---- OBJ2  objective2

OBJ2
                (.LO, .L, .UP, .M = -INF, -13776431.8757048, +INF, 0)
        1       Entropy2


---- qTsal1  varA

qTsal1
                (.LO, .L, .UP, .M = -INF, 0.99999771223408, +INF, 0)
      (-9.6668) CON(1)
      (-9.6236) CON(2)
      (-9.7214) CON(3)
      (-9.791)  CON(4)
      (-9.882)  CON(5)
      (-9.8272) CON(6)
      (-9.7591) CON(7)
      (-9.6548) CON(8)
      (-9.7984) CON(9)
      (-9.8005) CON(10)
     (-10.0153) CON(11)
      (-9.6247) CON(12)
        1       conTsal1


---- qTsal2  varP

qTsal2
                (.LO, .L, .UP, .M = -INF, 0.999998190903357, +INF, 0)
      (-0.0014) CON(1)
      (-0.001)  CON(2)
      (-0.0009) CON(3)
      (-0.0009) CON(4)
      (-0.0008) CON(5)
      (-0.0006) CON(6)
      (-0.0005) CON(7)
      (-0.0002) CON(8)
      (-0.0002) CON(9)
      (-0.0001) CON(10)
      (-0.0005) CON(11)
      (-0.0002) CON(12)
        1       conTsal2


---- qTsal3  varD

qTsal3
                (.LO, .L, .UP, .M = -INF, 0.99999989082084, +INF, 0)
       (0.0046) CON(1)
       (0.004)  CON(2)
       (0.0039) CON(3)
       (0.0038) CON(4)
       (0.0038) CON(5)
       (0.0033) CON(6)
       (0.0028) CON(7)
       (0.002)  CON(8)
       (0.0018) CON(9)
       (0.0016) CON(10)
       (0.0029) CON(11)
       (0.0017) CON(12)
        1       conTsal3


---- qTsal4  varW

qTsal4(1)
                (.LO, .L, .UP, .M = -INF, 0.999998600696891, +INF, 0)
       (0.9761) CON(1)
        1       conTsal4(1)

qTsal4(2)
                (.LO, .L, .UP, .M = -INF, 0.99999842773995, +INF, 0)
       (0.5976) CON(2)
        1       conTsal4(2)

qTsal4(3)
                (.LO, .L, .UP, .M = -INF, 0.999997641732618, +INF, 0)
       (0.5089) CON(3)
        1       conTsal4(3)

REMAINING 9 ENTRIES SKIPPED
GAMS 24.1.3  r41464 Released Jul 26, 2013 WIN-VS8 x86/MS Windows 02/27/14 17:12:43 Page 9
G e n e r a l   A l g e b r a i c   M o d e l i n g   S y s t e m
Model Statistics    SOLVE CESFrance Using DNLP From line 227


MODEL STATISTICS

BLOCKS OF EQUATIONS          15     SINGLE EQUATIONS           48
BLOCKS OF VARIABLES          11     SINGLE VARIABLES           93
NON ZERO ELEMENTS           610     NON LINEAR N-Z            455
DERIVATIVE POOL              10     CONSTANT POOL              60
CODE LENGTH               4,163


GENERATION TIME      =        0.016 SECONDS      3 MB  24.1.3 r41464 WIN-VS8


EXECUTION TIME       =        0.016 SECONDS      3 MB  24.1.3 r41464 WIN-VS8
GAMS 24.1.3  r41464 Released Jul 26, 2013 WIN-VS8 x86/MS Windows 02/27/14 17:12:43 Page 10
G e n e r a l   A l g e b r a i c   M o d e l i n g   S y s t e m
Solution Report     SOLVE CESFrance Using DNLP From line 227


               S O L V E      S U M M A R Y

     MODEL   CESFrance           OBJECTIVE  OBJ2
     TYPE    DNLP                DIRECTION  MINIMIZE
     SOLVER  MINOS5              FROM LINE  227

**** SOLVER STATUS     1 Normal Completion
**** MODEL STATUS      2 Locally Optimal
**** OBJECTIVE VALUE        -13776453.3924

 RESOURCE USAGE, LIMIT          0.078    100000.000
 ITERATION COUNT, LIMIT        60    2000000000
 EVALUATION ERRORS              0             0

GAMS/MINOS       24.1.3 r41464 Released Jul 26, 2013 VS8 x86/MS Windows
M I N O S  5.51     (Jun 2004)

    GAMS/MINOS 5.51, Large Scale Nonlinear Solver
    B. A. Murtagh, University of New South Wales
    P. E. Gill, University of California at San Diego,
    W. Murray, M. A. Saunders, and M. H. Wright,
    Systems Optimization Laboratory, Stanford University

 Work space allocated           --     0.91 Mb

 EXIT - Optimal Solution found, objective:      -0.1377645E+08


                       LOWER     LEVEL     UPPER    MARGINAL

---- EQU Entropy1        .         .         .         EPS
---- EQU Entropy2        .         .         .        1.000
---- EQU ADD1           1.000     1.000     1.000 7.309E-13
---- EQU ADD2           1.000     1.000     1.000 4.4049E-4
---- EQU ADD3           1.000     1.000     1.000    -0.001

  Entropy1  objective function entropy Csiszar type
  Entropy2  objective function entropy Bregman type
  ADD1  parameter additivity constraints A
  ADD2  error additivity constraints P
  ADD3  parameter additivity constraints D

---- EQU ADD4  parameter additivity constraints W

      LOWER     LEVEL     UPPER    MARGINAL

1      1.000     1.000     1.000 2.8701E+5
2      1.000     1.000     1.000 2.8701E+5
3      1.000     1.000     1.000 2.8701E+5
4      1.000     1.000     1.000 2.8701E+5
5      1.000     1.000     1.000 2.8701E+5
6      1.000     1.000     1.000 2.8701E+5
7      1.000     1.000     1.000 2.8701E+5
8      1.000     1.000     1.000 2.8701E+5
9      1.000     1.000     1.000 2.8701E+5
10     1.000     1.000     1.000 2.8701E+5
11     1.000     1.000     1.000 2.8701E+5
12     1.000     1.000     1.000 2.8701E+5

                       LOWER     LEVEL     UPPER    MARGINAL

---- EQU ADD5           0.001     0.500     +INF      0.002
---- EQU ADD6           -INF      0.500     0.999      .
---- EQU ADD7           -INF     -1.000    -1.000      EPS
---- EQU ADD9            .         .         .    -9.017E-4

  ADD5  errors additivity to zero W
  ADD6  constraint of proportionality d
  ADD7  constraint of proportionality d
  ADD9  contraining of elasticity parameter

---- EQU CON  consistency constraints

      LOWER     LEVEL     UPPER    MARGINAL

1      8.691     8.691     8.691     0.006
2      9.026     9.026     9.026    -0.006
3      9.212     9.212     9.212    -0.002
4      9.325     9.325     9.325 -4.892E-4
5      9.442     9.442     9.442    -0.003
6      9.689     9.689     9.689     0.004
7      9.877     9.877     9.877 9.0131E-4
8     10.211    10.211    10.211 -6.997E-4
9     10.550    10.550    10.550 -2.630E-4
10    10.621    10.621    10.621 7.0166E-5
11    10.162    10.162    10.162     0.001
12    10.359    10.359    10.359 -3.821E-4

                       LOWER     LEVEL     UPPER    MARGINAL

---- EQU conTsal1        .         .         .    7.309E-13
---- EQU conTsal2        .         .         .    4.4049E-4
---- EQU conTsal3        .         .         .       -0.001

  conTsal1  Tsallis consistency A
  conTsal2  Tsallis consistency P
  conTsal3  Tsallis consistency D

---- EQU conTsal4  Tsallis consistency W

      LOWER     LEVEL     UPPER    MARGINAL

1       .         .         .    6.3087E-6
2       .         .         .    -3.918E-6
3       .         .         .    -8.470E-7
4       .         .         .    -2.308E-7
5       .         .         .    -1.388E-6
6       .         .         .    6.1163E-7
7       .         .         .    -1.073E-7
8       .         .         .    3.9401E-7
9       .         .         .    2.0012E-7
10      .         .         .    -5.834E-8
11      .         .         .    -2.042E-7
12      .         .         .    2.8406E-7

---- VAR A  parameter probabilities for posterior  alfa

     LOWER     LEVEL     UPPER    MARGINAL

1     0.001     0.001     1.000 5.700E-16
2     0.001     0.001     1.000 3.176E-16
3     0.001     0.462     1.000      .
4     0.001     0.298     1.000      .
5     0.001     0.238     1.000 -6.40E-16

---- VAR P  parameter probabilities for posterior p

     LOWER     LEVEL     UPPER    MARGINAL

1     0.001     0.198     +INF       .
2     0.001     0.006     +INF     -0.001
3     0.001     0.794     +INF       .
4     0.001     0.001     +INF      0.001
5     0.001     0.001     +INF      0.002

---- VAR D  parameter probabilities for posterior d

     LOWER     LEVEL     UPPER    MARGINAL

1     0.001     0.001     1.000 2.2293E-7
2     0.001     0.001     1.000 1.3499E-7
3     0.001     0.896     1.000      .
4     0.001     0.001     1.000 -7.998E-8
5     0.001     0.101     1.000      .

                       LOWER     LEVEL     UPPER    MARGINAL

---- VAR q              1.000     1.000     +INF  4.162E+12

  q  parameter tsallis

---- VAR W  error probabilities for posterior weights

        LOWER     LEVEL     UPPER    MARGINAL

1 .1     0.001     0.200     1.000      .
1 .2     0.001     0.201     1.000     0.004
1 .3     0.001     0.200     1.000    -0.006
1 .4     0.001     0.198     1.000    -0.024
1 .5     0.001     0.201     1.000      .
2 .1     0.001     0.200     1.000      .
2 .2     0.001     0.199     1.000      .
2 .3     0.001     0.200     1.000     0.013
2 .4     0.001     0.201     1.000     0.023
2 .5     0.001     0.200     1.000     0.019
3 .1     0.001     0.200     1.000      .
3 .2     0.001     0.200     1.000     0.003
3 .3     0.001     0.199     1.000    -0.011
3 .4     0.001     0.200     1.000      .
3 .5     0.001     0.201     1.000     0.012
4 .1     0.001     0.200     1.000      .
4 .2     0.001     0.201     1.000     0.005
4 .3     0.001     0.199     1.000    -0.011
4 .4     0.001     0.200     1.000      .
4 .5     0.001     0.201     1.000     0.009
5 .1     0.001     0.200     1.000      .
5 .2     0.001     0.200     1.000     0.007
5 .3     0.001     0.199     1.000 -5.703E-4
5 .4     0.001     0.199     1.000      .
5 .5     0.001     0.201     1.000     0.018
6 .1     0.001     0.200     1.000      .
6 .2     0.001     0.200     1.000 8.9827E-5
6 .3     0.001     0.200     1.000    -0.006
6 .4     0.001     0.200     1.000      .
6 .5     0.001     0.200     1.000    -0.009
7 .1     0.001     0.200     1.000      .
7 .2     0.001     0.200     1.000 -1.541E-4
7 .3     0.001     0.200     1.000 2.4730E-4
7 .4     0.001     0.200     1.000      .
7 .5     0.001     0.200     1.000 -8.881E-4
8 .1     0.001     0.200     1.000      .
8 .2     0.001     0.200     1.000     0.001
8 .3     0.001     0.199     1.000    -0.006
8 .4     0.001     0.200     1.000     0.004
8 .5     0.001     0.200     1.000      .
9 .1     0.001     0.200     1.000      .
9 .2     0.001     0.201     1.000     0.009
9 .3     0.001     0.200     1.000    -0.002
9 .4     0.001     0.200     1.000     0.003
9 .5     0.001     0.200     1.000      .
10.1     0.001     0.200     1.000      .
10.2     0.001     0.201     1.000     0.012
10.3     0.001     0.200     1.000 -6.944E-4
10.4     0.001     0.200     1.000     0.002
10.5     0.001     0.200     1.000      .
11.1     0.001     0.200     1.000      .
11.2     0.001     0.200     1.000 -4.285E-4
11.3     0.001     0.200     1.000 -5.775E-4
11.4     0.001     0.200     1.000      .
11.5     0.001     0.200     1.000    -0.003
12.1     0.001     0.200     1.000      .
12.2     0.001     0.201     1.000     0.008
12.3     0.001     0.200     1.000 3.7618E-4
12.4     0.001     0.200     1.000     0.004
12.5     0.001     0.200     1.000      .

                       LOWER     LEVEL     UPPER    MARGINAL

---- VAR OBJ1           -INF  -1.813E+5     +INF       .
---- VAR OBJ2           -INF  -1.378E+7     +INF       .
---- VAR qTsal1         -INF      1.000     +INF       .
---- VAR qTsal2         -INF      1.000     +INF       .
---- VAR qTsal3         -INF      1.000     +INF       .

  OBJ1  objective1
  OBJ2  objective2
  qTsal1  varA
  qTsal2  varP
  qTsal3  varD

---- VAR qTsal4  varW

      LOWER     LEVEL     UPPER    MARGINAL

1      -INF      1.000     +INF       .
2      -INF      1.000     +INF       .
3      -INF      1.000     +INF       .
4      -INF      1.000     +INF       .
5      -INF      1.000     +INF       .
6      -INF      1.000     +INF       .
7      -INF      1.000     +INF       .
8      -INF      1.000     +INF       .
9      -INF      1.000     +INF       .
10     -INF      1.000     +INF       .
11     -INF      1.000     +INF       .
12     -INF      1.000     +INF       .


**** REPORT SUMMARY :        0     NONOPT
                             0 INFEASIBLE
                             0  UNBOUNDED
                             0     ERRORS
GAMS 24.1.3  r41464 Released Jul 26, 2013 WIN-VS8 x86/MS Windows 02/27/14 17:12:43 Page 11
G e n e r a l   A l g e b r a i c   M o d e l i n g   S y s t e m
E x e c u t i o n


----    234 VARIABLE q.L                   =        1.000  parameter tsallis

----    253 VARIABLE OBJ2.L                =  -1.39577E+7  objective2

----    253 PARAMETER logLL  in sample pronostical Y

1   8.690,    2   9.025,    3   9.212,    4   9.325,    5   9.441,    6   9.689
7   9.877,    8  10.211,    9  10.551,    10 10.622,    11 10.162,    12 10.359


----    253 PARAMETER Y  dependent variables

         lnVAt

1        8.691
2        9.026
3        9.212
4        9.325
5        9.442
6        9.689
7        9.877
8       10.211
9       10.550
10      10.621
11      10.162
12      10.359


----    253 VARIABLE A.L  parameter probabilities for posterior  alfa

1 0.001,    2 0.001,    3 0.462,    4 0.298,    5 0.238


----    253 VARIABLE P.L  parameter probabilities for posterior p

1 0.198,    2 0.006,    3 0.794,    4 0.001,    5 0.001


----    253 VARIABLE D.L  parameter probabilities for posterior d

1 0.001,    2 0.001,    3 0.896,    4 0.001,    5 0.101


----    253 VARIABLE q.L                   =        1.000  parameter tsallis

----    253 PARAMETER Beta  estimates

ao  2.000,    pu -1.000,    du  0.500


----    261 VARIABLE q.L                   =        1.000  parameter tsallis
            PARAMETER alfa                 =        0.050
            PARAMETER R_2                  =  5.439772E-5  determination coeffic
                                                           ient

----    261 PARAMETER ets  estimation of random term

1  9.972607E-4,    2  6.114770E-4,    3  5.211471E-4,    4  4.773597E-4
5  4.509908E-4,    6  1.432522E-4,    7  -1.17245E-4,    8  -5.64204E-4
9  -7.63351E-4,    10 -8.34235E-4,    11 -1.47205E-4,    12 -7.45749E-4


----    261 VARIABLE OBJ2.L                =  -1.39577E+7  objective2


EXECUTION TIME       =        0.000 SECONDS      3 MB  24.1.3 r41464 WIN-VS8


USER: GAMS Development Corporation, Washington, DC   G871201/0000CA-ANY
      Free Demo,  202-342-0180,  sales@gams.com,  www.gams.com   DC0000


**** FILE SUMMARY

Input      H:\OutputComputationBwanakare\Tsallis entropyCET_DO_EX24_2_14.gms
Output     C:\Users\sbwanakare\Documents\gamsdir\projdir\Tsallis entropyCET_DO_E
           X24_2_14.lst
